# Supplementary material for: A Disease-Associated Microbial and Metabolomics State in Relatives of Pediatric Inflammatory Bowel Disease Patients
Source: PubMed Central journal article supplement — Cell Mol Gastroenterol Hepatol. 2016 Jul 2;2(6):750–66. doi: 10.1016/j.jcmgh.2016.06.004 (PMC5247316; doi:10.1016/j.jcmgh.2016.06.004), 2016-07-02
Supplement: mmc1.pdf [file mmc1.pdf]

## DATA FILE S1

### Increased in CD vs non-IBD

| Name                            | Log2 FC | Qvalue  | Also increased in |                 |
|---------------------------------|---------|---------|-------------------|-----------------|
|                                 |         |         | UC vs Non-IBD     | OTU-type 2 vs 1 |
| Enterobacteriaceae(f)_295053    | 8.19    | 8.2E-05 |                   | x               |
| Enterobacteriaceae(f)_236142    | 8.00    | 4.9E-05 |                   |                 |
| Enterobacteriaceae(f)_297771    | 7.91    | 5.4E-05 |                   | x               |
| Enterobacteriaceae(f)_2749126   | 7.85    | 2.1E-03 |                   | x               |
| Bacteroides_coprophilus_2730944 | 7.80    | 2.6E-03 |                   |                 |
| Enterobacteriaceae(f)_566243    | 7.74    | 3.8E-04 |                   | x               |
| Enterobacteriaceae(f)_4392183   | 7.67    | 2.1E-04 |                   | x               |
| Enterobacteriaceae(f)_4432891   | 7.62    | 1.5E-04 |                   | x               |
| Enterobacteriaceae(f)_284014    | 7.53    | 5.0E-07 |                   | x               |
| Enterobacteriaceae(f)_289709    | 7.47    | 9.9E-06 |                   | x               |
| Enterobacteriaceae(f)_299267    | 7.37    | 6.7E-04 |                   | x               |
| Enterobacteriaceae(f)_4407939   | 7.26    | 4.1E-04 |                   | x               |
| Enterobacteriaceae(f)_4454531   | 7.13    | 2.6E-03 |                   | x               |
| Enterobacteriaceae(f)_4354477   | 6.95    | 1.7E-03 |                   | x               |
| Veillonella_dispar_4318671      | 6.94    | 4.1E-04 |                   | x               |
| Serratia_marcescens_2304693     | 6.91    | 5.6E-04 |                   | x               |
| Plesiomonas_147860              | 6.85    | 2.5E-03 |                   | x               |
| Serratia_marcescens_1517154     | 6.77    | 4.5E-04 |                   | x               |
| Enterobacteriaceae(f)_3867172   | 6.74    | 6.5E-03 |                   |                 |
| Enterobacteriaceae(f)_1028632   | 6.71    | 6.5E-03 |                   | x               |
| Clostridium_4459634             | 6.67    | 0.01    |                   |                 |
| Enterobacteriaceae(f)_1108656   | 6.67    | 0.02    |                   |                 |
| Peptostreptococcaceae(f)_130402 | 6.66    | 4.4E-03 |                   | x               |
| Enterobacteriaceae(f)_9727      | 6.61    | 2.1E-03 |                   | x               |
| Serratia_marcescens_560465      | 6.55    | 0.01    |                   |                 |
| Ruminococcaceae(f)_840376       | 6.52    | 9.3E-03 |                   |                 |
| Enterobacteriaceae(f)_4380886   | 6.51    | 6.2E-03 |                   | x               |
| Gammaproteobacteria(o)_300200   | 6.49    | 2.4E-03 |                   | x               |
| Enterococcus_224813             | 6.47    | 5.0E-03 |                   | x               |
| Ruminococcaceae(f)_178713       | 6.39    | 0.02    |                   |                 |
| Enterobacteriaceae(f)_148003    | 6.35    | 6.2E-03 |                   | x               |
| Enterobacteriaceae(f)_292289    | 6.33    | 6.7E-04 |                   | x               |
| Veillonella_dispar_4475758      | 6.24    | 1.2E-02 |                   | x               |
| Serratia_558281                 | 6.14    | 2.1E-03 |                   | x               |
| Desulfovibrio_573061            | 6.13    | 0.01    |                   | x               |
| Veillonella_dispar_4297420      | 6.12    | 6.2E-03 |                   | x               |
| Veillonella_dispar_4316391      | 5.94    | 4.1E-04 |                   | x               |
| Ruminococcaceae(f)_342487       | 5.89    | 0.01    |                   |                 |
| Veillonella_dispar_4371880      | 5.87    | 0.03    |                   | x               |
| Peptostreptococcaceae(f)_308502 | 5.84    | 3.8E-04 |                   | x               |
| Enterobacteriaceae(f)_3531225   | 5.83    | 0.02    |                   | x               |

|                                      |      |         |   |   |
|--------------------------------------|------|---------|---|---|
| Clostridiales(o)_36647               | 5.73 | 0.02    |   |   |
| Lachnospiraceae(f)_4343184           | 5.70 | 6.2E-03 |   |   |
| Enterobacteriaceae(f)_924547         | 5.69 | 1.5E-02 |   | x |
| Enterobacteriaceae(f)_4457268        | 5.68 | 0.03    |   | x |
| Ruminococcaceae(f)_189630            | 5.62 | 9.7E-03 |   |   |
| Sutterella_178885                    | 5.62 | 0.03    |   |   |
| Ruminococcaceae(f)_230421            | 5.62 | 3.5E-03 |   |   |
| Ruminococcus_180509                  | 5.59 | 6.5E-04 |   |   |
| Streptococcus_4416763                | 5.52 | 0.02    |   |   |
| Dorea_185668                         | 5.48 | 0.04    |   | x |
| Clostridiaceae(f)_180552             | 5.45 | 3.1E-03 |   |   |
| [Ruminococcus]_gnavus_198251         | 5.42 | 9.7E-03 |   | x |
| Aggregatibacter_4363066              | 5.24 | 0.02    |   |   |
| Bifidobacterium_longum_591285        | 5.19 | 3.5E-03 |   |   |
| Bifidobacterium_adolescentis_4347159 | 5.14 | 1.3E-03 |   |   |
| Lachnospiraceae(f)_16340             | 5.12 | 0.03    |   |   |
| Actinomycetaceae(f)_4472050          | 4.98 | 0.03    |   |   |
| Clostridiales(o)_319870              | 4.95 | 0.01    |   |   |
| Bifidobacterium_132041               | 4.94 | 8.4E-03 |   |   |
| Ruminococcaceae(f)_184803            | 4.88 | 0.03    |   |   |
| Enterobacteriaceae(f)_510870         | 4.80 | 0.02    |   | x |
| Streptococcus_4297222                | 4.78 | 0.03    |   |   |
| Blautia_producta_341930              | 4.73 | 0.04    |   |   |
| Ruminococcus_4331723                 | 4.65 | 3.4E-03 |   |   |
| [Ruminococcus]_gnavus_184729         | 4.64 | 0.03    |   | x |
| Veillonella_dispar_4326452           | 4.63 | 0.03    |   | x |
| Actinomyces_526682                   | 4.63 | 6.5E-03 |   | x |
| Streptococcus_4467992                | 4.61 | 2.1E-03 |   | x |
| Ruminococcus_189150                  | 4.59 | 0.03    |   |   |
| Blautia_producta_192025              | 4.55 | 0.04    |   |   |
| Haemophilus_parainfluenzae_2654263   | 4.51 | 0.05    |   | x |
| Bifidobacterium_4376828              | 4.45 | 9.9E-03 |   |   |
| Streptococcus_499109                 | 4.42 | 0.01    |   | x |
| Mycoplasma_136049                    | 4.40 | 0.02    |   | x |
| Coprococcus_188079                   | 4.39 | 0.03    |   |   |
| Dorea_196176                         | 4.38 | 0.03    |   | x |
| Lachnospiraceae(f)_4479443           | 4.38 | 0.02    |   |   |
| Ruminococcus_180826                  | 4.38 | 0.04    |   |   |
| Streptococcus_272150                 | 4.33 | 3.3E-04 | x | x |
| Lachnospiraceae(f)_193458            | 4.25 | 0.02    |   |   |
| Streptococcus_536866                 | 4.21 | 0.01    |   | x |
| Oscillospira_4366089                 | 4.21 | 0.02    |   |   |
| Streptococcus_4425214                | 4.17 | 4.1E-04 |   | x |
| Granulicatella_1696853               | 4.14 | 1.3E-03 |   | x |
| Streptococcus_3166216                | 4.09 | 7.2E-03 | x | x |
| Blautia_producta_212341              | 4.05 | 0.02    |   | x |
| Veillonella_parvula_4391625          | 4.04 | 0.02    |   | x |

|                                     |      |         |   |   |
|-------------------------------------|------|---------|---|---|
| Bifidobacterium_4413347             | 4.00 | 0.02    |   |   |
| SMB53_316496                        | 3.98 | 7.4E-03 | x |   |
| Bifidobacterium_pseudolongum_681370 | 3.85 | 0.03    |   |   |
| Streptococcus_3449122               | 3.80 | 0.01    |   | x |
| Streptococcus_3723096               | 3.75 | 2.1E-03 | x | x |
| Lachnospiraceae(f)_177986           | 3.73 | 0.05    |   | x |
| Blautia_186427                      | 3.63 | 0.02    |   |   |
| [Ruminococcus]_gnavus_307903        | 3.53 | 0.03    |   | x |
| Bradyrhizobiaceae(f)_1144357        | 3.36 | 0.02    |   | x |
| Mycoplasma_4461490                  | 3.31 | 0.03    |   | x |
| Veillonella_dispar_4458306          | 3.30 | 0.04    |   | x |
| Parabacteroides_distasonis_4365130  | 3.29 | 0.04    |   |   |
| Peptostreptococcaceae(f)_1133172    | 3.29 | 0.05    |   |   |
| Lachnospiraceae(f)_289927           | 3.24 | 0.05    |   | x |
| Clostridiaceae(f)_4434334           | 3.24 | 0.03    |   | x |
| Lachnospiraceae(f)_310160           | 3.16 | 0.02    |   |   |
| Oscillospira_180468                 | 2.80 | 0.05    |   |   |
| Gemellaceae(f)_4453535              | 2.62 | 0.05    |   | x |
| Actinomyces_12574                   | 2.53 | 0.02    |   | x |

## Decreased in CD vs non-IBD

| Name                                | Log2 FC | Qvalue  | Also decreased in |                 |
|-------------------------------------|---------|---------|-------------------|-----------------|
|                                     |         |         | UC vs Non-IBD     | OTU-type 2 vs 1 |
| Lachnospiraceae(f)_189292           | -7.04   | 2.1E-03 | x                 |                 |
| Clostridiales(o)_182073             | -6.96   | 2.1E-03 |                   |                 |
| Clostridiales(o)_4336940            | -6.12   | 0.03    |                   |                 |
| Clostridiales(o)_197698             | -5.85   | 0.01    |                   | x               |
| Ruminococcaceae(f)_4396292          | -5.85   | 7.4E-03 |                   | x               |
| Oscillospira_4474760                | -5.79   | 0.02    |                   |                 |
| Clostridiales(o)_36892              | -5.79   | 0.01    | x                 |                 |
| Ruminococcus_1139897                | -5.75   | 8.4E-03 |                   |                 |
| Clostridiaceae(f)_337511            | -5.58   | 0.05    |                   | x               |
| Bacteroides_fragilis_4386507        | -5.39   | 9.0E-03 |                   |                 |
| Lachnospiraceae(f)_4448492          | -5.16   | 4.5E-03 |                   |                 |
| Bacteroides_fragilis_1918384        | -5.07   | 0.02    |                   |                 |
| Bacteroides_fragilis_4377091        | -5.04   | 0.01    |                   |                 |
| Clostridiales(o)_359509             | -4.94   | 0.04    |                   |                 |
| Lachnospiraceae(f)_183039           | -4.81   | 0.02    |                   |                 |
| Bacteroides_125270                  | -4.78   | 0.05    |                   |                 |
| Blautia_194615                      | -4.78   | 0.02    |                   |                 |
| Faecalibacterium_prausnitzii_181422 | -4.72   | 1.5E-03 |                   |                 |
| Rikenellaceae(f)_107044             | -4.70   | 0.04    |                   |                 |
| Lachnospiraceae(f)_2120784          | -4.64   | 0.05    | x                 |                 |
| Bacteroides_fragilis_4433823        | -4.59   | 0.01    | x                 |                 |
| Ruminococcaceae(f)_4094259          | -4.58   | 0.01    |                   |                 |
| Lachnospiraceae(f)_4437368          | -4.58   | 0.02    |                   |                 |

|                                     |       |      |   |   |
|-------------------------------------|-------|------|---|---|
| Clostridiales(o)_309892             | -4.46 | 0.01 |   |   |
| Lachnospiraceae(f)_4356065          | -4.41 | 0.02 | x |   |
| Bacteroides_fragilis_2731539        | -4.34 | 0.03 | x |   |
| Lachnospiraceae(f)_312586           | -4.32 | 0.03 | x |   |
| Lachnospiraceae(f)_4254528          | -4.30 | 0.01 |   |   |
| Roseburia_174998                    | -4.13 | 0.01 |   |   |
| Faecalibacterium_prausnitzii_184000 | -4.07 | 0.02 |   |   |
| Lachnospiraceae(f)_192093           | -4.04 | 0.04 |   |   |
| Ruminococcaceae(f)_193709           | -3.93 | 0.01 |   |   |
| Clostridiales(o)_3756485            | -3.89 | 0.05 |   |   |
| Lachnospira_316732                  | -3.84 | 0.02 |   |   |
| Bacteroides_fragilis_3325988        | -3.84 | 0.05 |   |   |
| Ruminococcus_2979308                | -3.78 | 0.02 |   |   |
| Clostridiales(o)_374557             | -3.75 | 0.03 | x |   |
| Bacteroides_fragilis_4393172        | -3.72 | 0.03 |   |   |
| Clostridiales(o)_183296             | -3.70 | 0.05 |   |   |
| Faecalibacterium_prausnitzii_367417 | -3.70 | 0.04 |   |   |
| Coprococcus_4405104                 | -3.67 | 0.03 | x |   |
| Ruminococcaceae(f)_174818           | -3.66 | 0.01 |   |   |
| Roseburia_177055                    | -3.61 | 0.03 |   |   |
| Faecalibacterium_prausnitzii_319275 | -3.57 | 0.05 |   |   |
| Lachnospiraceae(f)_193477           | -3.57 | 0.01 |   |   |
| Lachnospiraceae(f)_198511           | -3.56 | 0.05 |   |   |
| Bacteroides_fragilis_2200896        | -3.35 | 0.02 | x |   |
| Clostridiales(o)_180307             | -3.32 | 0.04 |   |   |
| Ruminococcaceae(f)_180285           | -3.31 | 0.03 |   |   |
| Bacteroides_178478                  | -3.27 | 0.04 | x |   |
| Lachnospiraceae(f)_179637           | -3.20 | 0.05 |   |   |
| Roseburia_faecis_2532173            | -3.04 | 0.03 |   | x |
| Blautia_194648                      | -3.02 | 0.02 |   |   |
| Ruminococcaceae(f)_195651           | -2.83 | 0.04 |   |   |
| Blautia_191978                      | -2.69 | 0.03 |   |   |

## Increased in UC vs non-IBD

| Name                      | Log2 FC | Qvalue | Also increased in |                 |
|---------------------------|---------|--------|-------------------|-----------------|
|                           |         |        | CD vs Non-IBD     | OTU-type 2 vs 1 |
| Turicibacter_248902       | 6.07    | 0.01   |                   | x               |
| SMB53_3805518             | 5.99    | 0.03   |                   |                 |
| Turicibacter_294885       | 5.42    | 0.04   |                   | x               |
| Blautia_436032            | 4.49    | 0.03   |                   |                 |
| Ruminococcaceae(f)_196982 | 4.41    | 0.04   |                   |                 |
| SMB53_316496              | 4.05    | 0.04   | x                 |                 |
| Streptococcus_3166216     | 3.96    | 0.04   | x                 | x               |
| Streptococcus_3723096     | 3.64    | 0.03   | x                 | x               |
| Streptococcus_272150      | 3.29    | 0.04   | x                 | x               |
| Blautia_174747            | 2.88    | 0.04   |                   |                 |

## Decreased in UC vs non-IBD

| Name                            | Log2 FC | Qvalue  | Also decreased in |                 |
|---------------------------------|---------|---------|-------------------|-----------------|
|                                 |         |         | CD vs Non-IBD     | OTU-type 2 vs 1 |
| Oscillospira_110192             | -9.14   | 1.1E-03 |                   |                 |
| Clostridiales(o)_3973322        | -7.37   | 0.03    |                   |                 |
| Clostridiales(o)_836693         | -7.03   | 0.03    |                   |                 |
| Lachnospiraceae(f)_2120784      | -6.78   | 0.03    | x                 |                 |
| Clostridiales(o)_178712         | -6.76   | 0.04    |                   |                 |
| Clostridiales(o)_36892          | -6.75   | 0.03    | x                 |                 |
| Parabacteroides_gordonii_150412 | -6.73   | 0.04    |                   |                 |
| Bacteroides_fragilis_130663     | -6.70   | 0.03    |                   |                 |
| Christensenellaceae(f)_363519   | -6.58   | 0.04    |                   |                 |
| Ruminococcaceae(f)_145883       | -6.54   | 0.01    |                   |                 |
| Ruminococcaceae(f)_300620       | -6.46   | 0.03    |                   |                 |
| Lachnospiraceae(f)_4464065      | -6.37   | 0.03    |                   |                 |
| Ruminococcaceae(f)_470117       | -6.24   | 0.04    |                   |                 |
| Ruminococcus_198980             | -6.16   | 0.03    |                   |                 |
| Lachnospiraceae(f)_189292       | -6.04   | 0.04    | x                 |                 |
| Bacteroides_fragilis_2731539    | -5.98   | 0.03    | x                 |                 |
| Akkermansia_muciniphila_548475  | -5.87   | 0.03    |                   | x               |
| Parabacteroides_4372003         | -5.72   | 0.04    |                   |                 |
| Ruminococcus_278928             | -5.69   | 0.03    |                   | x               |
| Ruminococcaceae(f)_196307       | -5.20   | 0.04    |                   | x               |
| Lachnospiraceae(f)_4356065      | -5.19   | 0.03    | x                 |                 |
| Clostridiales(o)_374557         | -5.08   | 0.03    | x                 |                 |
| Lachnospiraceae(f)_312586       | -5.06   | 0.05    | x                 |                 |
| Coprococcus_4405104             | -5.03   | 0.03    | x                 |                 |
| Rikenellaceae(f)_4476780        | -5.00   | 0.03    |                   |                 |
| Bacteroides_fragilis_4433823    | -4.85   | 0.03    | x                 |                 |
| Clostridiales(o)_4385326        | -4.83   | 0.03    |                   |                 |
| Bacteroides_178478              | -4.79   | 0.03    | x                 |                 |
| Bacteroides_2656868             | -4.69   | 0.03    |                   |                 |
| Ruminococcaceae(f)_194686       | -4.56   | 0.04    |                   | x               |
| Oscillospira_95502              | -4.51   | 0.05    |                   |                 |
| Bacteroides_fragilis_2200896    | -4.32   | 0.03    | x                 |                 |
| Bacteroides_192055              | -3.73   | 0.04    |                   |                 |
| Bacteroides_2061739             | -3.61   | 0.03    |                   |                 |

## Increased in OTU-type 2 vs. 1

| Name                          | Log2 FC | Qvalue  | Also increased in |               |
|-------------------------------|---------|---------|-------------------|---------------|
|                               |         |         | CD vs Non-IBD     | UC vs Non-IBD |
| Enterobacteriaceae(f)_528421  | 8.13    | 7.9E-06 |                   |               |
| [Ruminococcus]_gnavus_3409376 | 7.99    | 2.1E-09 |                   |               |
| Veillonellaceae(f)_4397439    | 7.60    | 2.2E-03 |                   |               |
| Enterobacteriaceae(f)_540402  | 7.40    | 4.2E-03 |                   |               |

|                                |      |         |   |
|--------------------------------|------|---------|---|
| Coprococcus_300952             | 7.07 | 1.7E-08 |   |
| Enterobacteriaceae(f)_3908638  | 6.96 | 1.1E-03 |   |
| Lachnospiraceae(f)_183865      | 6.74 | 1.9E-10 |   |
| Dorea_2992128                  | 6.73 | 3.8E-09 |   |
| [Ruminococcus]_gnavus_1111191  | 6.71 | 5.1E-09 |   |
| Enterobacteriaceae(f)_4368600  | 6.69 | 0.01    |   |
| Klebsiella_511908              | 6.68 | 5.7E-05 |   |
| Enterobacteriaceae(f)_4376230  | 6.67 | 0.01    |   |
| Enterobacteriaceae(f)_228556   | 6.49 | 0.01    |   |
| [Ruminococcus]_gnavus_196370   | 6.49 | 3.7E-06 |   |
| Salmonella_enterica_4350788    | 6.46 | 0.01    |   |
| Enterobacter_cowanii_176468    | 6.40 | 0.01    |   |
| Dorea_623471                   | 6.25 | 1.2E-05 |   |
| Enterobacteriaceae(f)_3531225  | 6.25 | 1.0E-04 | x |
| Erwinia_9912                   | 6.22 | 0.01    |   |
| Enterobacteriaceae(f)_510870   | 6.18 | 2.2E-08 | x |
| Enterobacteriaceae(f)_534965   | 6.18 | 0.02    |   |
| Enterobacteriaceae(f)_91962    | 6.16 | 0.02    |   |
| [Ruminococcus]_gnavus_190908   | 6.12 | 1.9E-08 |   |
| [Ruminococcus]_gnavus_2281172  | 6.11 | 4.3E-07 |   |
| Enterobacteriaceae(f)_4389289  | 6.11 | 0.02    |   |
| Erysipelotrichaceae(f)_3413566 | 6.09 | 9.3E-12 |   |
| Clostridiales(o)_334258        | 6.09 | 2.1E-05 |   |
| Lachnospiraceae(f)_188675      | 6.09 | 8.1E-07 |   |
| Lachnospiraceae(f)_199455      | 6.07 | 6.6E-06 |   |
| [Ruminococcus]_gnavus_164872   | 5.87 | 0.02    |   |
| Enterobacteriaceae(f)_366451   | 5.86 | 0.02    |   |
| Clostridiales(o)_206213        | 5.77 | 4.0E-06 |   |
| Lachnospiraceae(f)_186385      | 5.74 | 1.0E-05 |   |
| Lachnospiraceae(f)_191999      | 5.73 | 4.2E-08 |   |
| Clostridiales(o)_274115        | 5.69 | 8.2E-10 |   |
| Dorea_2789595                  | 5.66 | 2.2E-04 |   |
| Enterobacteriaceae(f)_824742   | 5.62 | 0.03    |   |
| Coprococcus_186819             | 5.60 | 6.4E-06 |   |
| [Ruminococcus]_gnavus_4343631  | 5.59 | 8.1E-07 |   |
| Erwinia_806143                 | 5.58 | 0.03    |   |
| [Ruminococcus]_gnavus_1713225  | 5.57 | 5.1E-07 |   |
| [Ruminococcus]_gnavus_182882   | 5.55 | 9.3E-12 |   |
| Lachnospiraceae(f)_2056188     | 5.55 | 5.0E-06 |   |
| Veillonella_dispar_4353251     | 5.53 | 1.1E-03 |   |
| Blautia_producta_192326        | 5.50 | 0.03    |   |
| Veillonella_dispar_4371880     | 5.50 | 2.2E-03 | x |
| [Ruminococcus]_gnavus_182517   | 5.49 | 6.5E-12 |   |
| Veillonella_dispar_4326452     | 5.48 | 1.2E-05 | x |
| Enterobacteriaceae(f)_819636   | 5.47 | 0.03    |   |
| Erysipelotrichaceae(f)_4390365 | 5.46 | 1.1E-06 |   |
| Veillonella_parvula_3889756    | 5.45 | 3.5E-02 |   |

|                                |      |         |   |
|--------------------------------|------|---------|---|
| Lachnospiraceae(f)_195449      | 5.45 | 9.3E-08 |   |
| Clostridiales(o)_288442        | 5.41 | 1.7E-08 |   |
| Enterobacteriaceae(f)_746679   | 5.40 | 0.04    |   |
| Klebsiella_537085              | 5.39 | 0.04    |   |
| Streptococcus_237444           | 5.39 | 3.6E-03 |   |
| Enterococcus_224813            | 5.38 | 9.6E-05 | x |
| Clostridiales(o)_192225        | 5.36 | 1.1E-08 |   |
| Bacteroides_fragilis_130663    | 5.31 | 2.3E-05 |   |
| Blautia_producta_3696710       | 5.31 | 2.7E-07 |   |
| Clostridiales(o)_295312        | 5.30 | 1.7E-03 |   |
| [Ruminococcus]_gnavus_183495   | 5.29 | 5.4E-07 |   |
| Clostridiaceae(f)_2325032      | 5.25 | 6.9E-04 |   |
| [Ruminococcus]_gnavus_4435690  | 5.24 | 3.7E-06 |   |
| [Ruminococcus]_gnavus_184729   | 5.24 | 3.1E-05 | x |
| Prevotella_copri_189083        | 5.21 | 2.0E-07 |   |
| Lachnospiraceae(f)_548503      | 5.20 | 0.04    |   |
| Lachnospiraceae(f)_4444095     | 5.15 | 1.2E-05 |   |
| [Ruminococcus]_gnavus_363692   | 5.12 | 3.3E-03 |   |
| Bacilli(o)_225919              | 5.10 | 0.05    |   |
| Clostridiales(o)_321469        | 5.10 | 0.01    |   |
| Blautia_204681                 | 5.10 | 3.9E-04 |   |
| [Ruminococcus]_gnavus_173722   | 5.09 | 0.05    |   |
| [Ruminococcus]_gnavus_259087   | 5.03 | 2.9E-07 |   |
| Lachnospiraceae(f)_4325261     | 4.98 | 0.04    |   |
| Dorea_4437917                  | 4.97 | 1.7E-06 |   |
| Lachnospiraceae(f)_4086959     | 4.96 | 4.1E-09 |   |
| Enterobacteriaceae(f)_4454531  | 4.96 | 2.1E-03 | x |
| [Ruminococcus]_gnavus_176704   | 4.95 | 2.7E-05 |   |
| Lachnospiraceae(f)_669005      | 4.94 | 1.4E-04 |   |
| Blautia_producta_4429536       | 4.93 | 1.6E-05 |   |
| Blautia_317205                 | 4.93 | 0.01    |   |
| Lachnospiraceae(f)_4464065     | 4.92 | 2.0E-04 |   |
| Clostridiaceae(f)_743082       | 4.91 | 1.1E-02 |   |
| Clostridiales(o)_327931        | 4.89 | 4.5E-03 |   |
| Desulfovibrio_573061           | 4.87 | 2.5E-03 | x |
| [Ruminococcus]_gnavus_197435   | 4.83 | 3.2E-06 |   |
| Lachnospiraceae(f)_4441615     | 4.81 | 2.2E-08 |   |
| Lachnospiraceae(f)_2148365     | 4.79 | 3.1E-08 |   |
| Blautia_1611482                | 4.77 | 4.8E-03 |   |
| [Ruminococcus]_gnavus_292294   | 4.77 | 5.5E-06 |   |
| Lachnospiraceae(f)_4094866     | 4.74 | 1.1E-11 |   |
| Lachnospiraceae(f)_177986      | 4.72 | 3.7E-06 | x |
| Serratia_558281                | 4.70 | 1.1E-04 | x |
| [Eubacterium]_dolichum_3709990 | 4.69 | 1.2E-11 |   |
| Ruminococcaceae(f)_189443      | 4.69 | 1.5E-06 |   |
| Lachnospiraceae(f)_132892      | 4.64 | 7.9E-07 |   |
| [Ruminococcus]_gnavus_193749   | 4.64 | 4.2E-08 |   |

|                               |      |         |   |
|-------------------------------|------|---------|---|
| Lachnospiraceae(f)_176467     | 4.64 | 1.1E-03 |   |
| Veillonella_dispar_2676430    | 4.64 | 7.7E-04 |   |
| [Ruminococcus]_gnavus_194858  | 4.63 | 3.6E-07 |   |
| Lachnospiraceae(f)_4412022    | 4.62 | 2.1E-03 |   |
| Lachnospiraceae(f)_301549     | 4.62 | 1.1E-05 |   |
| Lachnospiraceae(f)_4404187    | 4.60 | 6.0E-03 |   |
| Catenibacterium_4480861       | 4.60 | 1.7E-04 |   |
| [Ruminococcus]_gnavus_110221  | 4.58 | 0.02    |   |
| [Eubacterium]_dolichum_851715 | 4.58 | 0.01    |   |
| Blautia_producta_290362       | 4.54 | 2.2E-04 |   |
| Fusobacterium_4405869         | 4.53 | 2.0E-03 |   |
| Veillonella_dispar_4475758    | 4.51 | 4.5E-03 | x |
| [Ruminococcus]_gnavus_3750373 | 4.50 | 0.01    |   |
| Veillonella_dispar_4297420    | 4.50 | 1.0E-03 | x |
| Gemellaceae(f)_925707         | 4.50 | 0.04    |   |
| Bacteroides_fragilis_1918384  | 4.49 | 1.5E-04 |   |
| Blautia_364048                | 4.47 | 3.5E-04 |   |
| Lachnospiraceae(f)_4473977    | 4.46 | 3.5E-03 |   |
| Clostridiales(o)_288930       | 4.46 | 1.2E-03 |   |
| [Ruminococcus]_gnavus_1624382 | 4.44 | 2.7E-05 |   |
| Butyrivibrio_777944           | 4.43 | 2.9E-06 |   |
| Ruminococcaceae(f)_187582     | 4.42 | 1.8E-06 |   |
| Enterobacteriaceae(f)_148003  | 4.41 | 3.2E-03 | x |
| Erysipelotrichaceae(f)_45363  | 4.41 | 1.1E-03 |   |
| Enterobacteriaceae(f)_4407939 | 4.41 | 1.2E-03 | x |
| [Ruminococcus]_gnavus_4426874 | 4.38 | 1.7E-03 |   |
| Ruminococcaceae(f)_197929     | 4.38 | 3.5E-06 |   |
| [Ruminococcus]_gnavus_331575  | 4.35 | 0.01    |   |
| Lachnospiraceae(f)_2688034    | 4.35 | 0.03    |   |
| Enterobacteriaceae(f)_4457268 | 4.33 | 0.01    | x |
| Enterobacteriaceae(f)_9727    | 4.32 | 1.3E-03 | x |
| Clostridiales(o)_4442899      | 4.32 | 1.0E-04 |   |
| Lachnospiraceae(f)_95974      | 4.31 | 0.03    |   |
| Lachnospiraceae(f)_4454025    | 4.30 | 5.4E-04 |   |
| Lachnospiraceae(f)_3857424    | 4.29 | 6.9E-05 |   |
| Blautia_195166                | 4.29 | 3.5E-05 |   |
| Blautia_179549                | 4.26 | 0.04    |   |
| Clostridiales(o)_184320       | 4.26 | 7.8E-05 |   |
| Blautia_198915                | 4.24 | 5.9E-03 |   |
| Lachnospiraceae(f)_4417418    | 4.23 | 1.1E-03 |   |
| Veillonella_parvula_4328910   | 4.23 | 2.7E-05 |   |
| Lactobacillus_289918          | 4.22 | 0.02    |   |
| Lachnospiraceae(f)_4028553    | 4.21 | 2.8E-06 |   |
| Lachnospiraceae(f)_268620     | 4.21 | 9.1E-04 |   |
| Clostridiaceae(f)_4439530     | 4.21 | 7.4E-03 |   |
| Anaerostipes_4412336          | 4.20 | 3.5E-03 |   |
| Bacteroides_fragilis_2430693  | 4.18 | 1.6E-03 |   |



|                                 |      |         |   |
|---------------------------------|------|---------|---|
| Clostridiales(o)_179861         | 4.16 | 0.02    |   |
| Coprococcus_217060              | 4.15 | 2.2E-06 |   |
| Lachnospiraceae(f)_3508701      | 4.09 | 4.4E-04 |   |
| Fusobacterium_4473295           | 4.09 | 0.02    |   |
| Clostridiales(o)_146226         | 4.08 | 1.3E-05 |   |
| Clostridiales(o)_4383924        | 4.07 | 9.1E-04 |   |
| Lachnospiraceae(f)_4440624      | 4.07 | 1.4E-03 |   |
| Blautia_320786                  | 4.07 | 9.7E-04 |   |
| Enterobacteriaceae(f)_4392183   | 4.06 | 2.2E-03 | x |
| Bacteroides_fragilis_4386507    | 4.06 | 2.8E-04 |   |
| Blautia_529608                  | 4.05 | 5.3E-07 |   |
| Lachnospiraceae(f)_1602805      | 4.04 | 8.1E-07 |   |
| Peptostreptococcaceae(f)_130402 | 4.03 | 0.01    | x |
| Lachnospiraceae(f)_290281       | 4.03 | 3.3E-03 |   |
| Blautia_351067                  | 4.03 | 3.0E-04 |   |
| Clostridiales(o)_306368         | 4.01 | 1.2E-06 |   |
| Gammaproteobacteria(o)_300200   | 4.01 | 4.6E-03 | x |
| Lactobacillus_zeae_1546671      | 4.01 | 0.04    |   |
| Enterobacteriaceae(f)_2749126   | 4.00 | 0.02    | x |
| [Mogibacteriaceae](f)_145856    | 4.00 | 0.01    |   |
| Bacteroides_fragilis_2731539    | 4.00 | 1.7E-04 |   |
| Lachnospiraceae(f)_299858       | 4.00 | 1.2E-05 |   |
| Bacteroides_fragilis_4433823    | 4.00 | 9.6E-06 |   |
| Dorea_4470603                   | 3.99 | 4.0E-03 |   |
| Veillonella_dispar_4316391      | 3.99 | 3.0E-05 | x |
| Lachnospiraceae(f)_185251       | 3.99 | 3.1E-04 |   |
| Clostridiales(o)_34139          | 3.97 | 1.1E-04 |   |
| Bacteroides_fragilis_4393172    | 3.97 | 9.1E-06 |   |
| Coprococcus_72606               | 3.97 | 7.0E-05 |   |
| Dorea_834840                    | 3.96 | 1.0E-03 |   |
| Rothia_mucilaginoso_4294457     | 3.96 | 0.02    |   |
| Lachnospiraceae(f)_340642       | 3.95 | 1.1E-04 |   |
| Lachnospiraceae(f)_296330       | 3.94 | 1.4E-04 |   |
| Bacteroides_fragilis_339599     | 3.93 | 0.01    |   |
| Bacteroides_fragilis_3325988    | 3.91 | 1.1E-04 |   |
| Lachnospiraceae(f)_4470092      | 3.91 | 6.0E-05 |   |
| Actinomyces_4334479             | 3.88 | 0.03    |   |
| Dorea_185668                    | 3.87 | 0.02    | x |
| Coprococcus_325279              | 3.86 | 0.03    |   |
| Enterobacteriaceae(f)_296358    | 3.86 | 0.03    |   |
| Dorea_4391326                   | 3.85 | 8.2E-03 |   |
| Clostridiales(o)_536535         | 3.85 | 6.2E-03 |   |
| Enterobacteriaceae(f)_4354477   | 3.85 | 0.01    | x |
| Clostridiales(o)_4347520        | 3.85 | 1.9E-06 |   |
| NA(o)_715138                    | 3.84 | 1.4E-03 |   |
| Bacteroides_fragilis_4474593    | 3.84 | 9.2E-03 |   |
| Blautia_4404507                 | 3.84 | 1.7E-03 |   |

|                                 |      |         |   |
|---------------------------------|------|---------|---|
| Veillonella_dispar_2406759      | 3.84 | 0.01    |   |
| Lachnospiraceae(f)_3747551      | 3.83 | 1.8E-03 |   |
| Blautia_producta_288367         | 3.82 | 1.8E-03 |   |
| Dialister_4437515               | 3.82 | 1.9E-04 |   |
| Clostridiales(o)_345986         | 3.81 | 5.9E-04 |   |
| Dialister_185555                | 3.80 | 2.4E-03 |   |
| Blautia_190956                  | 3.80 | 9.8E-07 |   |
| Dorea_320430                    | 3.78 | 1.2E-03 |   |
| Coprococcus_177933              | 3.77 | 1.3E-03 |   |
| Dorea_1557179                   | 3.77 | 1.8E-03 |   |
| Blautia_producta_212341         | 3.76 | 1.1E-04 | x |
| Lachnospiraceae(f)_13986        | 3.75 | 0.02    |   |
| [Eubacterium]_dolichum_3002161  | 3.73 | 4.1E-03 |   |
| Lachnospiraceae(f)_509709       | 3.72 | 4.5E-05 |   |
| Lachnospiraceae(f)_190502       | 3.72 | 3.0E-06 |   |
| Lachnospiraceae(f)_287580       | 3.71 | 1.5E-02 |   |
| Bacteroides_fragilis_4377091    | 3.71 | 3.1E-04 |   |
| Dialister_4405669               | 3.71 | 1.6E-03 |   |
| Clostridiaceae(f)_191797        | 3.69 | 3.3E-03 |   |
| Serratia_marcescens_2304693     | 3.69 | 4.0E-03 | x |
| Oscillospira_3302038            | 3.69 | 3.6E-04 |   |
| Bacteroides_fragilis_2200896    | 3.68 | 2.2E-07 |   |
| Oscillospira_194425             | 3.68 | 1.7E-03 |   |
| Bacteroides_fragilis_183603     | 3.67 | 1.8E-06 |   |
| Blautia_99566                   | 3.66 | 3.5E-07 |   |
| Blautia_297856                  | 3.66 | 0.04    |   |
| Streptococcus_4424239           | 3.64 | 0.02    |   |
| Lachnospiraceae(f)_182428       | 3.64 | 1.9E-03 |   |
| Blautia_188690                  | 3.64 | 5.8E-03 |   |
| Lachnospiraceae(f)_4359984      | 3.63 | 4.7E-08 |   |
| Lachnospiraceae(f)_4444262      | 3.62 | 5.0E-04 |   |
| Lachnospiraceae(f)_291794       | 3.62 | 0.04    |   |
| Dialister_358364                | 3.62 | 1.4E-03 |   |
| Lachnospiraceae(f)_302407       | 3.61 | 1.1E-04 |   |
| Peptostreptococcaceae(f)_534957 | 3.60 | 6.8E-03 |   |
| Streptococcus_3449122           | 3.59 | 1.9E-05 | x |
| Blautia_193744                  | 3.59 | 4.2E-08 |   |
| Bacteroides_uniformis_196664    | 3.59 | 0.02    |   |
| Blautia_363348                  | 3.58 | 4.2E-08 |   |
| Ruminococcaceae(f)_327383       | 3.57 | 0.01    |   |
| Lachnospiraceae(f)_4030287      | 3.57 | 2.7E-03 |   |
| Oscillospira_3903651            | 3.57 | 4.2E-08 |   |
| Clostridiales(o)_833816         | 3.56 | 0.01    |   |
| Lachnospiraceae(f)_4379646      | 3.55 | 1.6E-04 |   |
| Oscillospira_1010876            | 3.55 | 1.6E-04 |   |
| [Ruminococcus]_2686590          | 3.55 | 9.1E-04 |   |
| [Ruminococcus]_gnavus_295075    | 3.55 | 0.02    |   |

|                                    |      |         |   |
|------------------------------------|------|---------|---|
| Bacteroides_524442                 | 3.52 | 0.02    |   |
| Blautia_producta_338355            | 3.51 | 0.01    |   |
| [Ruminococcus]_4458700             | 3.50 | 3.7E-04 |   |
| Ruminococcaceae(f)_211907          | 3.50 | 3.2E-03 |   |
| Clostridiales(o)_4356466           | 3.49 | 0.04    |   |
| Lachnospiraceae(f)_4446238         | 3.48 | 0.02    |   |
| Streptococcus_92535                | 3.48 | 2.8E-03 |   |
| Ruminococcaceae(f)_192857          | 3.48 | 0.02    |   |
| Planococcaceae(f)_1061772          | 3.48 | 1.9E-04 |   |
| Streptococcus_499109               | 3.48 | 9.0E-04 | x |
| Clostridiales(o)_345303            | 3.47 | 0.03    |   |
| Enterobacteriaceae(f)_924547       | 3.47 | 0.02    | x |
| Fingoldia_1096610                  | 3.46 | 0.01    |   |
| Clostridiales(o)_184497            | 3.45 | 4.6E-03 |   |
| [Ruminococcus]_4464533             | 3.45 | 0.03    |   |
| Lachnospiraceae(f)_183925          | 3.45 | 0.01    |   |
| Dorea_4422656                      | 3.44 | 6.7E-03 |   |
| Enterobacteriaceae(f)_4380886      | 3.44 | 0.03    | x |
| Enterobacteriaceae(f)_1028632      | 3.44 | 0.03    | x |
| Blautia_197481                     | 3.44 | 9.3E-08 |   |
| Blautia_191395                     | 3.44 | 1.0E-06 |   |
| Lachnospiraceae(f)_4316569         | 3.43 | 0.02    |   |
| Lachnospiraceae(f)_4429608         | 3.43 | 4.8E-05 |   |
| Blautia_360660                     | 3.43 | 9.3E-08 |   |
| Blautia_177349                     | 3.42 | 2.8E-07 |   |
| Sutterella_4217226                 | 3.39 | 8.2E-03 |   |
| Blautia_331253                     | 3.38 | 6.7E-07 |   |
| Oscillospira_3302039               | 3.36 | 9.0E-03 |   |
| Lachnospiraceae(f)_196748          | 3.36 | 0.02    |   |
| Ruminococcaceae(f)_327969          | 3.36 | 7.0E-03 |   |
| Clostridium_296420                 | 3.35 | 0.03    |   |
| Clostridiaceae(f)_342666           | 3.35 | 0.03    |   |
| Enterobacteriaceae(f)_299267       | 3.35 | 0.02    | x |
| Haemophilus_parainfluenzae_2654263 | 3.35 | 0.01    | x |
| Blautia_191601                     | 3.35 | 2.2E-07 |   |
| Coprococcus_4307265                | 3.34 | 4.8E-03 |   |
| Veillonella_511378                 | 3.34 | 0.04    |   |
| Blautia_180629                     | 3.34 | 1.7E-07 |   |
| Dialister_4364011                  | 3.34 | 4.1E-03 |   |
| Erysipelotrichaceae(f)_4379449     | 3.34 | 3.3E-03 |   |
| Lachnospiraceae(f)_289927          | 3.34 | 1.3E-04 | x |
| Enterobacteriaceae(f)_292289       | 3.33 | 0.00    | x |
| [Ruminococcus]_gnavus_189403       | 3.33 | 0.02    |   |
| Dorea_196176                       | 3.33 | 4.2E-03 | x |
| Blautia_531582                     | 3.33 | 9.2E-07 |   |
| Streptococcus_536866               | 3.33 | 5.0E-04 | x |
| [Ruminococcus]_3438642             | 3.32 | 1.3E-04 |   |

|                                |      |         |   |
|--------------------------------|------|---------|---|
| Enterobacteriaceae(f)_295053   | 3.32 | 0.01    | x |
| Lachnospiraceae(f)_634449      | 3.32 | 1.7E-03 |   |
| Blautia_174589                 | 3.31 | 1.7E-07 |   |
| [Ruminococcus]_gnavus_198251   | 3.31 | 0.01    | x |
| Lachnospiraceae(f)_294440      | 3.31 | 2.1E-03 |   |
| Blautia_367456                 | 3.31 | 1.9E-07 |   |
| Dorea_3673770                  | 3.30 | 1.8E-03 |   |
| Dorea_179319                   | 3.30 | 1.6E-05 |   |
| Dorea_formicigenerans_197248   | 3.30 | 0.03    |   |
| Bacteroides_fragilis_128205    | 3.29 | 0.01    |   |
| Dialister_753638               | 3.29 | 0.01    |   |
| Ruminococcaceae(f)_296134      | 3.29 | 4.5E-06 |   |
| Clostridiales(o)_322840        | 3.29 | 0.03    |   |
| Lachnospiraceae(f)_4422727     | 3.28 | 9.5E-03 |   |
| Dorea_1877675                  | 3.28 | 0.05    |   |
| Blautia_360392                 | 3.27 | 1.5E-05 |   |
| [Ruminococcus]_gnavus_2901239  | 3.27 | 2.1E-03 |   |
| Dorea_653954                   | 3.27 | 0.03    |   |
| Veillonella_dispar_4318671     | 3.27 | 0.01    | x |
| Blautia_4208927                | 3.27 | 2.6E-06 |   |
| Blautia_194993                 | 3.27 | 4.1E-05 |   |
| Blautia_311080                 | 3.26 | 1.1E-03 |   |
| Blautia_365167                 | 3.25 | 7.9E-06 |   |
| Plesiomonas_147860             | 3.25 | 0.03    | x |
| Corynebacterium_durum_964220   | 3.24 | 3.0E-04 |   |
| Dorea_180577                   | 3.24 | 0.01    |   |
| Dorea_291784                   | 3.24 | 2.4E-04 |   |
| Blautia_335577                 | 3.23 | 6.0E-07 |   |
| Blautia_191740                 | 3.23 | 2.5E-06 |   |
| Lachnospiraceae(f)_174471      | 3.23 | 0.03    |   |
| [Ruminococcus]_torques_4381338 | 3.22 | 7.7E-03 |   |
| Blautia_183857                 | 3.22 | 1.7E-06 |   |
| Blautia_364274                 | 3.22 | 0.05    |   |
| Clostridiales(o)_4348107       | 3.22 | 2.6E-03 |   |
| Lachnospiraceae(f)_105976      | 3.22 | 3.4E-06 |   |
| Streptococcus_4425214          | 3.21 | 8.0E-07 | x |
| Ruminococcaceae(f)_360995      | 3.20 | 2.3E-07 |   |
| Blautia_359493                 | 3.20 | 4.3E-07 |   |
| Bacteroides_fragilis_4476964   | 3.20 | 0.02    |   |
| Bifidobacterium_4335781        | 3.20 | 0.02    |   |
| Blautia_362568                 | 3.19 | 3.2E-07 |   |
| Lachnospiraceae(f)_4361101     | 3.19 | 2.5E-02 |   |
| Lachnospiraceae(f)_174473      | 3.19 | 4.2E-08 |   |
| Lachnospiraceae(f)_4245940     | 3.19 | 2.4E-02 |   |
| Blautia_185563                 | 3.18 | 8.2E-07 |   |
| Clostridiales(o)_292892        | 3.17 | 0.01    |   |
| Veillonella_parvula_4391625    | 3.17 | 6.4E-04 | x |

|                                    |      |         |   |   |
|------------------------------------|------|---------|---|---|
| Blautia_187385                     | 3.17 | 8.0E-07 |   |   |
| Peptostreptococcaceae(f)_308502    | 3.16 | 8.2E-04 | x |   |
| Sarcina_300662                     | 3.16 | 0.01    |   |   |
| Oscillospira_181084                | 3.14 | 0.01    |   |   |
| Clostridiales(o)_649107            | 3.14 | 1.4E-03 |   |   |
| Blautia_131559                     | 3.14 | 4.4E-06 |   |   |
| Lachnospiraceae(f)_301156          | 3.13 | 0.03    |   |   |
| Dialister_4388437                  | 3.13 | 0.01    |   |   |
| Veillonella_dispar_4458306         | 3.13 | 2.2E-04 | x |   |
| Clostridiales(o)_269091            | 3.12 | 0.02    |   |   |
| Lachnospiraceae(f)_571081          | 3.12 | 4.9E-05 |   |   |
| Enterobacteriaceae(f)_284014       | 3.09 | 5.6E-04 | x |   |
| Ruminococcaceae(f)_178299          | 3.09 | 7.9E-06 |   |   |
| Peptostreptococcaceae(f)_547714    | 3.09 | 3.9E-03 |   |   |
| Peptostreptococcaceae(f)_919806    | 3.09 | 0.03    |   |   |
| Dorea_formicigenerans_186652       | 3.08 | 6.5E-04 |   |   |
| Dialister_2704013                  | 3.08 | 0.02    |   |   |
| Enterobacteriaceae(f)_566243       | 3.08 | 0.03    | x |   |
| Blautia_297970                     | 3.07 | 1.8E-03 |   |   |
| Lachnospiraceae(f)_178764          | 3.07 | 2.0E-03 |   |   |
| [Eubacterium]_dolichum_161001      | 3.07 | 0.01    |   |   |
| Clostridiales(o)_187144            | 3.07 | 0.01    |   |   |
| Lachnospiraceae(f)_4377328         | 3.06 | 0.02    |   |   |
| Lachnospiraceae(f)_555445          | 3.06 | 0.04    |   |   |
| Dorea_formicigenerans_4015729      | 3.05 | 3.5E-04 |   |   |
| Blautia_363735                     | 3.05 | 3.3E-03 |   |   |
| Dialister_4432433                  | 3.05 | 0.02    |   |   |
| Dorea_197050                       | 3.05 | 0.04    |   |   |
| Enterobacteriaceae(f)_297771       | 3.04 | 0.01    | x |   |
| Lachnospiraceae(f)_317048          | 3.04 | 0.02    |   |   |
| Dialister_403701                   | 3.04 | 0.02    |   |   |
| Haemophilus_parainfluenzae_2914680 | 3.03 | 0.03    |   |   |
| Enterobacteriaceae(f)_289709       | 3.02 | 2.6E-03 | x |   |
| Lachnospiraceae(f)_301062          | 3.02 | 9.2E-03 |   |   |
| Ruminococcaceae(f)_2855173         | 3.01 | 0.01    |   |   |
| Clostridiales(o)_547287            | 3.01 | 0.02    |   |   |
| Streptococcus_3166216              | 3.00 | 5.4E-04 | x | x |
| Dorea_192396                       | 3.00 | 0.01    |   |   |
| Lachnospiraceae(f)_2254001         | 3.00 | 0.03    |   |   |
| Lachnospiraceae(f)_174415          | 2.99 | 0.03    |   |   |
| Veillonella_4458959                | 2.99 | 0.01    |   |   |
| Haemophilus_parainfluenzae_4375080 | 2.98 | 1.4E-03 |   |   |
| Blautia_4296217                    | 2.98 | 7.4E-03 |   |   |
| Clostridiales(o)_30587             | 2.98 | 4.0E-03 |   |   |
| Actinomyces_12574                  | 2.97 | 2.5E-07 | x |   |
| Mycoplasma_136049                  | 2.97 | 5.5E-03 | x |   |
| Lachnospiraceae(f)_290632          | 2.96 | 0.01    |   |   |

|                                    |      |         |   |   |
|------------------------------------|------|---------|---|---|
| Blautia_13995                      | 2.95 | 1.3E-03 |   |   |
| Haemophilus_parainfluenzae_4383918 | 2.93 | 0.03    |   |   |
| Clostridiales(o)_166869            | 2.93 | 2.2E-03 |   |   |
| Lachnospiraceae(f)_2549971         | 2.93 | 2.6E-03 |   |   |
| Lachnospiraceae(f)_302683          | 2.93 | 3.1E-05 |   |   |
| Actinomyces_4459560                | 2.92 | 1.4E-04 |   |   |
| Ruminococcaceae(f)_21195           | 2.92 | 0.02    |   |   |
| Atopobium_4451251                  | 2.91 | 8.8E-03 |   |   |
| Clostridiaceae(f)_191218           | 2.90 | 0.03    |   |   |
| Lachnospiraceae(f)_361845          | 2.89 | 0.02    |   |   |
| [Eubacterium]_dolichum_4382457     | 2.89 | 0.03    |   |   |
| Blautia_183824                     | 2.89 | 1.5E-06 |   |   |
| Streptococcus_3723096              | 2.89 | 1.3E-05 | x | x |
| Bacteroides_192839                 | 2.89 | 4.5E-04 |   |   |
| Erysipelotrichaceae(f)_592616      | 2.88 | 2.8E-03 |   |   |
| Lachnospiraceae(f)_291950          | 2.88 | 1.4E-04 |   |   |
| Clostridiales(o)_2500766           | 2.88 | 9.4E-03 |   |   |
| Clostridiales(o)_142325            | 2.88 | 0.02    |   |   |
| Streptococcus_2953981              | 2.88 | 0.04    |   |   |
| Enterobacteriaceae(f)_4432891      | 2.88 | 0.02    | x |   |
| Dorea_171718                       | 2.87 | 1.6E-03 |   |   |
| Eggerthella_lenta_4393532          | 2.86 | 1.2E-03 |   |   |
| Mogibacterium_787663               | 2.86 | 5.2E-03 |   |   |
| Prevotella_1077373                 | 2.85 | 0.03    |   |   |
| Lachnospiraceae(f)_293990          | 2.85 | 1.6E-04 |   |   |
| Bacteroides_260410                 | 2.84 | 1.8E-03 |   |   |
| Lachnospiraceae(f)_320055          | 2.84 | 0.02    |   |   |
| Streptococcus_523025               | 2.83 | 0.03    |   |   |
| Lachnospiraceae(f)_3244992         | 2.82 | 0.02    |   |   |
| Clostridiales(o)_176865            | 2.82 | 2.4E-03 |   |   |
| Lachnospiraceae(f)_4431558         | 2.81 | 1.8E-05 |   |   |
| Lachnospiraceae(f)_4372382         | 2.81 | 0.05    |   |   |
| Clostridiales(o)_181903            | 2.81 | 5.3E-03 |   |   |
| Dorea_176877                       | 2.80 | 2.3E-06 |   |   |
| Lachnospiraceae(f)_297577          | 2.79 | 9.1E-03 |   |   |
| Coprococcus_197897                 | 2.79 | 1.7E-03 |   |   |
| Turicibacter_294885                | 2.79 | 0.02    |   | x |
| Streptococcus_881857               | 2.78 | 0.03    |   |   |
| Oscillospira_304777                | 2.76 | 1.4E-03 |   |   |
| Clostridiales(o)_359509            | 2.75 | 0.03    |   |   |
| Rothia_mucilaginosa_932077         | 2.75 | 0.01    |   |   |
| Bacteroides_4475642                | 2.75 | 1.6E-03 |   |   |
| Oribacterium_4310395               | 2.75 | 0.04    |   |   |
| Peptostreptococcaceae(f)_4354577   | 2.75 | 2.1E-03 |   |   |
| Dorea_288941                       | 2.74 | 1.6E-04 |   |   |
| Dorea_297182                       | 2.73 | 5.4E-03 |   |   |
| Lachnospiraceae(f)_2868079         | 2.73 | 0.01    |   |   |

|                                     |      |         |   |   |
|-------------------------------------|------|---------|---|---|
| Dorea_4225004                       | 2.72 | 8.2E-04 |   |   |
| Haemophilus_parainfluenzae_4374638  | 2.72 | 0.02    |   |   |
| Lachnospiraceae(f)_196135           | 2.72 | 1.5E-04 |   |   |
| Dialister_340113                    | 2.71 | 0.03    |   |   |
| [Ruminococcus]_gnavus_348642        | 2.71 | 0.02    |   |   |
| Lachnospiraceae(f)_193480           | 2.71 | 0.04    |   |   |
| Blautia_producta_576975             | 2.71 | 0.05    |   |   |
| Dorea_839545                        | 2.70 | 0.02    |   |   |
| [Ruminococcus]_gnavus_263138        | 2.70 | 0.03    |   |   |
| Blautia_182107                      | 2.69 | 1.2E-05 |   |   |
| Serratia_marcescens_1517154         | 2.69 | 0.02    | x |   |
| Lachnospiraceae(f)_295361           | 2.68 | 0.03    |   |   |
| Dorea_290101                        | 2.68 | 0.02    |   |   |
| Clostridiales(o)_189297             | 2.68 | 0.03    |   |   |
| [Mogibacteriaceae](f)_333859        | 2.66 | 0.01    |   |   |
| Oribacterium_686900                 | 2.66 | 0.01    |   |   |
| Dialister_4346490                   | 2.64 | 0.05    |   |   |
| [Ruminococcus]_4477479              | 2.62 | 2.6E-03 |   |   |
| Streptococcus_272150                | 2.62 | 8.9E-05 | x | x |
| Blautia_194513                      | 2.60 | 0.04    |   |   |
| Blautia_221784                      | 2.60 | 0.02    |   |   |
| Ruminococcaceae(f)_470117           | 2.58 | 0.04    |   |   |
| Blautia_341433                      | 2.58 | 0.04    |   |   |
| Ruminococcaceae(f)_197343           | 2.58 | 5.9E-03 |   |   |
| Dorea_323794                        | 2.57 | 0.03    |   |   |
| Acidaminococcus_2829179             | 2.56 | 3.3E-04 |   |   |
| Lachnospiraceae(f)_175704           | 2.56 | 1.1E-04 |   |   |
| Bradyrhizobiaceae(f)_1144357        | 2.56 | 1.9E-03 | x |   |
| Clostridium_174497                  | 2.56 | 0.03    |   |   |
| Gemellaceae(f)_4453535              | 2.56 | 4.1E-04 | x |   |
| Clostridiaceae(f)_4434334           | 2.56 | 1.7E-03 | x |   |
| Rikenellaceae(f)_107044             | 2.55 | 0.03    |   |   |
| Lachnospiraceae(f)_295417           | 2.55 | 0.04    |   |   |
| Faecalibacterium_prausnitzii_339087 | 2.52 | 0.02    |   |   |
| Blautia_362389                      | 2.52 | 2.8E-04 |   |   |
| Lachnospiraceae(f)_296872           | 2.51 | 0.05    |   |   |
| Blautia_193061                      | 2.51 | 0.02    |   |   |
| Streptococcus_941096                | 2.50 | 6.3E-03 |   |   |
| Blautia_365194                      | 2.49 | 0.04    |   |   |
| Lachnospiraceae(f)_196100           | 2.49 | 3.2E-05 |   |   |
| Clostridiaceae(f)_183089            | 2.48 | 0.01    |   |   |
| [Ruminococcus]_torques_175474       | 2.47 | 0.01    |   |   |
| Lachnospiraceae(f)_2391105          | 2.46 | 0.03    |   |   |
| Faecalibacterium_prausnitzii_183049 | 2.46 | 5.2E-03 |   |   |
| Bacteroides_186841                  | 2.45 | 2.2E-04 |   |   |
| Lachnospiraceae(f)_300672           | 2.43 | 0.01    |   |   |
| Mycoplasma_4461490                  | 2.43 | 0.01    | x |   |

|                               |      |         |   |   |
|-------------------------------|------|---------|---|---|
| Lachnospiraceae(f)_2128807    | 2.42 | 0.03    |   |   |
| Lachnospiraceae(f)_198521     | 2.42 | 1.9E-03 |   |   |
| Clostridiales(o)_4393565      | 2.41 | 6.8E-03 |   |   |
| [Mogibacteriaceae](f)_4335578 | 2.41 | 0.03    |   |   |
| Blautia_4359797               | 2.41 | 2.4E-04 |   |   |
| [Ruminococcus]_2686369        | 2.40 | 2.3E-03 |   |   |
| Blautia_194615                | 2.40 | 0.02    |   |   |
| Clostridiales(o)_182735       | 2.39 | 0.04    |   |   |
| Lachnospiraceae(f)_196577     | 2.38 | 0.03    |   |   |
| Clostridiales(o)_194089       | 2.38 | 3.5E-04 |   |   |
| Clostridiales(o)_834948       | 2.38 | 0.01    |   |   |
| Clostridiales(o)_177702       | 2.37 | 0.05    |   |   |
| Holdemania_15728              | 2.34 | 1.8E-03 |   |   |
| Dorea_185281                  | 2.34 | 0.02    |   |   |
| Lachnospiraceae(f)_179460     | 2.33 | 0.02    |   |   |
| Blautia_189588                | 2.32 | 4.5E-04 |   |   |
| Clostridiales(o)_182062       | 2.32 | 0.02    |   |   |
| Blautia_363029                | 2.29 | 2.9E-03 |   |   |
| Blautia_525378                | 2.29 | 2.9E-05 |   |   |
| Blautia_193666                | 2.29 | 3.8E-04 |   |   |
| Clostridiales(o)_180307       | 2.29 | 4.9E-03 |   |   |
| Lachnospiraceae(f)_186262     | 2.28 | 0.02    |   |   |
| Bacteroides_195258            | 2.25 | 5.6E-05 |   |   |
| Prevotella_4399109            | 2.24 | 0.01    |   |   |
| Granulicatella_1696853        | 2.24 | 2.2E-03 | x |   |
| Prevotella_copri_173565       | 2.23 | 0.03    |   |   |
| Clostridiales(o)_298379       | 2.23 | 0.02    |   |   |
| Dorea_197765                  | 2.22 | 0.01    |   |   |
| Ruminococcaceae(f)_2066056    | 2.21 | 0.05    |   |   |
| Clostridiales(o)_175972       | 2.20 | 4.8E-03 |   |   |
| Lachnospiraceae(f)_178439     | 2.19 | 0.05    |   |   |
| Blautia_178382                | 2.19 | 0.05    |   |   |
| Ruminococcaceae(f)_174288     | 2.19 | 0.01    |   |   |
| Ruminococcaceae(f)_311499     | 2.18 | 0.01    |   |   |
| Lachnospiraceae(f)_184178     | 2.18 | 0.03    |   |   |
| Blautia_2035344               | 2.17 | 4.9E-03 |   |   |
| [Ruminococcus]_gnavus_307903  | 2.15 | 0.02    | x |   |
| Lachnospiraceae(f)_176080     | 2.15 | 0.01    |   |   |
| Ruminococcus_3235048          | 2.14 | 0.03    |   |   |
| Ruminococcaceae(f)_4439469    | 2.12 | 4.3E-03 |   |   |
| Dorea_290548                  | 2.10 | 0.01    |   |   |
| Actinomyces_526682            | 2.09 | 0.03    | x |   |
| Ruminococcaceae(f)_185021     | 2.08 | 9.1E-04 |   |   |
| Turicibacter_248902           | 2.08 | 0.04    |   | x |
| Clostridiales(o)_182196       | 2.06 | 1.2E-03 |   |   |
| Bacteroides_2656868           | 2.06 | 4.0E-03 |   |   |
| Lachnospiraceae(f)_194733     | 2.05 | 3.9E-03 |   |   |



|                                      |      |         |   |
|--------------------------------------|------|---------|---|
| Ruminococcaceae(f)_4431545           | 2.05 | 2.9E-03 |   |
| Clostridiales(o)_181689              | 2.04 | 0.02    |   |
| Ruminococcaceae(f)_3577387           | 2.04 | 0.02    |   |
| Dorea_1667433                        | 2.04 | 0.00    |   |
| Bacteroides_2563561                  | 2.03 | 0.01    |   |
| Lachnospiraceae(f)_47477             | 2.02 | 0.04    |   |
| Lachnospiraceae(f)_194899            | 2.01 | 4.0E-03 |   |
| Lachnospiraceae(f)_4397737           | 2.00 | 0.03    |   |
| Clostridium_186389                   | 1.99 | 8.6E-04 |   |
| Faecalibacterium_prausnitzii_1943669 | 1.99 | 0.03    |   |
| Lachnospiraceae(f)_303897            | 1.99 | 0.01    |   |
| Blautia_197354                       | 1.95 | 2.6E-03 |   |
| Ruminococcus_4472091                 | 1.94 | 0.01    |   |
| Lachnospiraceae(f)_291147            | 1.93 | 0.05    |   |
| Bacteroides_eggerthii_4414420        | 1.92 | 0.05    |   |
| Clostridiales(o)_183169              | 1.92 | 2.8E-03 |   |
| Clostridiales(o)_181644              | 1.91 | 0.05    |   |
| Bacteroides_315429                   | 1.91 | 0.03    |   |
| Lachnospiraceae(f)_361972            | 1.90 | 0.03    |   |
| Lachnospiraceae(f)_195941            | 1.90 | 0.03    |   |
| Coprococcus_197022                   | 1.89 | 0.05    |   |
| Ruminococcaceae(f)_369014            | 1.89 | 3.3E-03 |   |
| Bacteroides_192684                   | 1.89 | 1.4E-03 |   |
| Streptococcus_4467992                | 1.89 | 0.03    | x |
| Lachnospiraceae(f)_516553            | 1.88 | 0.02    |   |
| Bulleidia_moorei_851938              | 1.88 | 0.02    |   |
| Ruminococcaceae(f)_1579962           | 1.88 | 0.04    |   |
| Clostridiales(o)_295737              | 1.88 | 0.03    |   |
| Ruminococcaceae(f)_177342            | 1.87 | 0.04    |   |
| [Prevotella]_4474533                 | 1.86 | 0.03    |   |
| Bacteroides_2061739                  | 1.84 | 2.2E-03 |   |
| Lachnospiraceae(f)_4469302           | 1.83 | 0.02    |   |
| Lachnospiraceae(f)_4435400           | 1.82 | 5.7E-03 |   |
| Ruminococcaceae(f)_335816            | 1.81 | 0.01    |   |
| Clostridiales(o)_180640              | 1.79 | 2.0E-03 |   |
| Lachnospiraceae(f)_321290            | 1.79 | 3.8E-03 |   |
| [Ruminococcus]_191050                | 1.77 | 0.03    |   |
| Lachnospiraceae(f)_192983            | 1.75 | 9.5E-03 |   |
| Faecalibacterium_prausnitzii_184000  | 1.75 | 0.04    |   |
| Clostridiales(o)_295250              | 1.75 | 0.04    |   |
| Blautia_191978                       | 1.74 | 4.8E-03 |   |
| [Ruminococcus]_gnavus_185088         | 1.73 | 0.02    |   |
| Bacteroides_ovatus_187623            | 1.71 | 0.02    |   |
| Lachnospiraceae(f)_529905            | 1.70 | 0.04    |   |
| Anaerostipes_541415                  | 1.68 | 0.01    |   |
| Lachnospiraceae(f)_4334624           | 1.67 | 0.03    |   |
| Blautia_181756                       | 1.56 | 0.03    |   |

|                           |      |      |  |  |
|---------------------------|------|------|--|--|
| Bacteroides_3583645       | 1.54 | 0.05 |  |  |
| Ruminococcaceae(f)_193709 | 1.54 | 0.04 |  |  |
| Ruminococcaceae(f)_180155 | 1.51 | 0.03 |  |  |
| Lachnospiraceae(f)_521496 | 1.46 | 0.03 |  |  |
| Bacteroides_182117        | 1.42 | 0.04 |  |  |
| Bacteroides_199190        | 1.39 | 0.02 |  |  |
| Blautia_192542            | 1.38 | 0.01 |  |  |
| Bacteroides_192255        | 1.36 | 0.02 |  |  |
| Bacteroides_caccae_193528 | 1.32 | 0.02 |  |  |
| Bacteroides_caccae_184567 | 1.32 | 0.05 |  |  |
| Blautia_176450            | 1.15 | 0.04 |  |  |

## Decreased in OTU-type 2 vs. 1

| Name                              | Log2 FC | Qvalue  | Also decreased in |               |
|-----------------------------------|---------|---------|-------------------|---------------|
|                                   |         |         | CD vs Non-IBD     | UC vs Non-IBD |
| Clostridiales(o)_168289           | -7.43   | 2.1E-06 |                   |               |
| Rikenellaceae(f)_2617854          | -6.84   | 5.1E-10 |                   |               |
| Ruminococcaceae(f)_191651         | -6.82   | 1.9E-05 |                   |               |
| Rikenellaceae(f)_214031           | -6.64   | 1.0E-06 |                   |               |
| Ruminococcaceae(f)_178713         | -5.98   | 6.9E-04 |                   |               |
| Clostridium_290974                | -5.87   | 1.3E-03 |                   |               |
| Lachnospiraceae(f)_173917         | -5.76   | 2.9E-05 |                   |               |
| Ruminococcaceae(f)_4404181        | -5.71   | 1.3E-04 |                   |               |
| Ruminococcaceae(f)_4446669        | -5.47   | 1.5E-04 |                   |               |
| Clostridiales(o)_309795           | -5.44   | 4.5E-03 |                   |               |
| Ruminococcaceae(f)_319693         | -5.40   | 2.6E-03 |                   |               |
| Ruminococcaceae(f)_178799         | -5.40   | 1.4E-03 |                   |               |
| Coriobacteriaceae(f)_177478       | -5.27   | 3.8E-04 |                   |               |
| Coprococcus_208901                | -5.23   | 0.01    |                   |               |
| Parabacteroides_gordonii_194286   | -5.22   | 3.0E-04 |                   |               |
| Clostridiales(o)_352604           | -5.21   | 6.9E-03 |                   |               |
| Ruminococcaceae(f)_350189         | -5.16   | 1.1E-03 |                   |               |
| Lachnospiraceae(f)_16340          | -5.13   | 2.3E-04 |                   |               |
| Lachnospiraceae(f)_4483337        | -5.11   | 3.2E-06 |                   |               |
| Ruminococcaceae(f)_3236435        | -5.04   | 1.3E-03 |                   |               |
| Clostridiales(o)_133719           | -5.00   | 0.01    |                   |               |
| [Mogibacteriaceae](f)_208539      | -4.91   | 3.6E-03 |                   |               |
| Ruminococcus_flavifaciens_1122673 | -4.86   | 1.3E-05 |                   |               |
| Clostridium_324315                | -4.85   | 0.02    |                   |               |
| Ruminococcaceae(f)_1102370        | -4.82   | 1.8E-03 |                   |               |
| Ruminococcaceae(f)_190453         | -4.74   | 0.02    |                   |               |
| Clostridium_4122608               | -4.65   | 0.01    |                   |               |
| Clostridium_4465124               | -4.58   | 4.9E-04 |                   |               |
| Ruminococcaceae(f)_521792         | -4.55   | 0.01    |                   |               |
| Ruminococcaceae(f)_190705         | -4.52   | 7.8E-03 |                   |               |
| Clostridiales(o)_187355           | -4.50   | 2.2E-03 |                   |               |

|                                 |       |         |   |
|---------------------------------|-------|---------|---|
| Ruminococcaceae(f)_4381054      | -4.48 | 0.04    |   |
| Clostridiales(o)_4419459        | -4.45 | 3.9E-03 |   |
| Ruminococcaceae(f)_793109       | -4.42 | 6.0E-03 |   |
| Ruminococcaceae(f)_840376       | -4.35 | 4.8E-03 |   |
| Clostridiales(o)_187816         | -4.33 | 3.2E-05 |   |
| Lachnospiraceae(f)_185864       | -4.32 | 4.5E-04 |   |
| Lachnospiraceae(f)_334573       | -4.30 | 0.01    |   |
| Ruminococcus_flavofaciens_44827 | -4.29 | 0.02    |   |
| Lachnospiraceae(f)_184394       | -4.16 | 3.1E-03 |   |
| Ruminococcaceae(f)_183207       | -4.05 | 3.8E-03 |   |
| Ruminococcaceae(f)_188192       | -4.00 | 1.0E-03 |   |
| Ruminococcus_227697             | -3.92 | 0.01    |   |
| Ruminococcaceae(f)_762699       | -3.89 | 2.2E-03 |   |
| Lachnospiraceae(f)_175698       | -3.87 | 1.4E-05 |   |
| Ruminococcaceae(f)_188747       | -3.83 | 3.6E-03 |   |
| Lachnospiraceae(f)_177047       | -3.83 | 0.03    |   |
| Ruminococcaceae(f)_196307       | -3.79 | 2.2E-04 | x |
| Ruminococcaceae(f)_195950       | -3.79 | 0.02    |   |
| Ruminococcaceae(f)_327218       | -3.76 | 1.1E-03 |   |
| Ruminococcaceae(f)_215231       | -3.76 | 0.01    |   |
| Lachnospiraceae(f)_189324       | -3.76 | 9.0E-04 |   |
| Lachnospiraceae(f)_292745       | -3.74 | 6.0E-03 |   |
| Ruminococcaceae(f)_341264       | -3.74 | 0.04    |   |
| Ruminococcaceae(f)_4300690      | -3.73 | 0.03    |   |
| Dehalobacterium_858999          | -3.69 | 0.02    |   |
| Ruminococcaceae(f)_182044       | -3.69 | 0.01    |   |
| Rikenellaceae(f)_4331760        | -3.64 | 3.4E-03 |   |
| Ruminococcus_512114             | -3.63 | 0.02    |   |
| Ruminococcaceae(f)_340711       | -3.62 | 0.01    |   |
| Ruminococcus_174614             | -3.62 | 0.01    |   |
| Ruminococcaceae(f)_288651       | -3.60 | 0.01    |   |
| Ruminococcaceae(f)_312766       | -3.59 | 6.0E-03 |   |
| Ruminococcaceae(f)_4465072      | -3.58 | 8.2E-04 |   |
| Clostridiales(o)_4301511        | -3.57 | 8.3E-04 |   |
| Ruminococcus_264978             | -3.56 | 2.9E-03 |   |
| Ruminococcaceae(f)_519880       | -3.56 | 0.02    |   |
| [Barnesiellaceae](f)_4476561    | -3.55 | 0.04    |   |
| Clostridiales(o)_310979         | -3.54 | 0.02    |   |
| Lachnospiraceae(f)_4458576      | -3.48 | 0.01    |   |
| Ruminococcaceae(f)_290284       | -3.48 | 0.04    |   |
| Lachnospiraceae(f)_843357       | -3.46 | 0.01    |   |
| Coprococcus_266062              | -3.46 | 0.01    |   |
| Clostridiales(o)_1835985        | -3.46 | 0.04    |   |
| [Barnesiellaceae](f)_4356080    | -3.40 | 0.01    |   |
| Clostridiales(o)_4425663        | -3.40 | 0.02    |   |
| Oscillospira_4408801            | -3.36 | 0.01    |   |
| Lachnospiraceae(f)_125624       | -3.35 | 5.5E-03 |   |

|                                      |       |         |   |   |
|--------------------------------------|-------|---------|---|---|
| Clostridiales(o)_179744              | -3.34 | 0.04    |   |   |
| Ruminococcaceae(f)_178773            | -3.31 | 0.02    |   |   |
| Coprococcus_188079                   | -3.31 | 0.01    |   |   |
| Clostridiaceae(f)_337511             | -3.26 | 0.05    | x |   |
| Oscillospira_176104                  | -3.26 | 0.01    |   |   |
| Coprococcus_4425669                  | -3.24 | 3.7E-03 |   |   |
| Rikenellaceae(f)_3084481             | -3.21 | 0.02    |   |   |
| Ruminococcaceae(f)_366352            | -3.20 | 0.01    |   |   |
| Ruminococcaceae(f)_306711            | -3.17 | 0.05    |   |   |
| Ruminococcaceae(f)_4412540           | -3.17 | 0.01    |   |   |
| Lachnospiraceae(f)_168071            | -3.17 | 0.02    |   |   |
| Clostridiaceae(f)_180552             | -3.15 | 3.3E-03 |   |   |
| [Barnesiellaceae](f)_3090117         | -3.14 | 8.2E-03 |   |   |
| Clostridiales(o)_4451392             | -3.07 | 9.5E-03 |   |   |
| Ruminococcus_180826                  | -3.06 | 0.01    |   |   |
| Ruminococcaceae(f)_187882            | -3.06 | 2.0E-03 |   |   |
| Oscillospira_4314257                 | -3.01 | 0.02    |   |   |
| Ruminococcaceae(f)_4370941           | -3.00 | 0.02    |   |   |
| Ruminococcaceae(f)_3530697           | -2.98 | 2.2E-04 |   |   |
| Ruminococcaceae(f)_4484075           | -2.97 | 4.1E-03 |   |   |
| Clostridiales(o)_308322              | -2.97 | 0.01    |   |   |
| Clostridiales(o)_351835              | -2.97 | 2.0E-03 |   |   |
| Ruminococcus_278928                  | -2.96 | 3.9E-03 |   | x |
| Lachnospiraceae(f)_2388088           | -2.96 | 0.02    |   |   |
| Lachnospiraceae(f)_4479443           | -2.95 | 6.8E-03 |   |   |
| Clostridiales(o)_199710              | -2.93 | 1.6E-03 |   |   |
| Ruminococcus_180509                  | -2.93 | 2.0E-03 |   |   |
| Ruminococcaceae(f)_179201            | -2.90 | 0.03    |   |   |
| Ruminococcaceae(f)_178353            | -2.83 | 0.01    |   |   |
| Ruminococcaceae(f)_181161            | -2.83 | 2.2E-03 |   |   |
| Ruminococcus_173792                  | -2.80 | 0.04    |   |   |
| Clostridiales(o)_149437              | -2.80 | 0.01    |   |   |
| Rikenellaceae(f)_4453609             | -2.79 | 2.3E-03 |   |   |
| Ruminococcaceae(f)_4396292           | -2.79 | 0.01    | x |   |
| [Ruminococcus]_4420959               | -2.79 | 0.02    |   |   |
| Ruminococcus_194816                  | -2.78 | 0.02    |   |   |
| Ruminococcaceae(f)_186136            | -2.78 | 0.04    |   |   |
| Ruminococcaceae(f)_195619            | -2.77 | 0.01    |   |   |
| Ruminococcus_189150                  | -2.73 | 2.6E-02 |   |   |
| Faecalibacterium_prausnitzii_2771891 | -2.73 | 1.4E-03 |   |   |
| Ruminococcaceae(f)_688923            | -2.72 | 0.01    |   |   |
| Clostridiales(o)_300646              | -2.71 | 0.01    |   |   |
| Bacteroides_185420                   | -2.70 | 2.9E-03 |   |   |
| Ruminococcaceae(f)_291266            | -2.66 | 0.01    |   |   |
| Ruminococcaceae(f)_189924            | -2.66 | 1.4E-03 |   |   |
| Ruminococcaceae(f)_181174            | -2.65 | 0.02    |   |   |
| Ruminococcus_148121                  | -2.65 | 0.01    |   |   |

|                                |       |         |   |   |
|--------------------------------|-------|---------|---|---|
| Ruminococcaceae(f)_182911      | -2.64 | 0.04    |   |   |
| Oscillospira_212686            | -2.62 | 0.01    |   |   |
| Bacteroides_180421             | -2.62 | 0.03    |   |   |
| Lachnospira_355975             | -2.60 | 8.7E-03 |   |   |
| Ruminococcaceae(f)_375106      | -2.59 | 0.04    |   |   |
| Clostridiales(o)_197698        | -2.59 | 0.04    | x |   |
| Ruminococcaceae(f)_4468466     | -2.55 | 0.03    |   |   |
| Coprococcus_4428676            | -2.55 | 0.01    |   |   |
| Ruminococcaceae(f)_177697      | -2.54 | 0.02    |   |   |
| Lachnospiraceae(f)_2119695     | -2.47 | 0.02    |   |   |
| Ruminococcaceae(f)_187504      | -2.47 | 4.4E-03 |   |   |
| Ruminococcaceae(f)_4364405     | -2.46 | 0.02    |   |   |
| Lachnospiraceae(f)_176808      | -2.46 | 5.5E-03 |   |   |
| Ruminococcaceae(f)_188872      | -2.44 | 0.02    |   |   |
| Ruminococcaceae(f)_188764      | -2.43 | 1.3E-03 |   |   |
| Ruminococcaceae(f)_193778      | -2.43 | 0.02    |   |   |
| Ruminococcaceae(f)_571642      | -2.41 | 0.01    |   |   |
| Oscillospira_4366089           | -2.41 | 0.02    |   |   |
| Akkermansia_muciniphila_548475 | -2.38 | 0.04    |   | x |
| [Mogibacteriaceae](f)_147484   | -2.36 | 0.04    |   |   |
| Lachnospiraceae(f)_4472130     | -2.33 | 9.3E-03 |   |   |
| Ruminococcaceae(f)_48084       | -2.26 | 0.01    |   |   |
| Ruminococcaceae(f)_1679707     | -2.25 | 0.03    |   |   |
| Ruminococcus_174712            | -2.21 | 0.02    |   |   |
| Ruminococcaceae(f)_187007      | -2.20 | 0.03    |   |   |
| Ruminococcaceae(f)_341221      | -2.18 | 0.05    |   |   |
| Clostridiales(o)_323189        | -2.17 | 0.02    |   |   |
| Odoribacter_4454586            | -2.17 | 0.05    |   |   |
| Ruminococcus_194101            | -2.15 | 0.04    |   |   |
| Ruminococcaceae(f)_194686      | -2.11 | 0.02    |   | x |
| Adlercreutzia_173965           | -2.09 | 0.03    |   |   |
| Parabacteroides_191251         | -2.08 | 0.05    |   |   |
| Lachnospira_3424188            | -2.08 | 0.02    |   |   |
| Christensenellaceae(f)_217109  | -2.03 | 0.02    |   |   |
| Bacteroides_uniformis_182886   | -2.01 | 0.01    |   |   |
| Ruminococcaceae(f)_193572      | -1.92 | 0.03    |   |   |
| Clostridiales(o)_370357        | -1.90 | 0.02    |   |   |
| Clostridiales(o)_2402366       | -1.89 | 0.03    |   |   |
| Ruminococcaceae(f)_192438      | -1.83 | 0.02    |   |   |
| Ruminococcaceae(f)_4343226     | -1.80 | 0.05    |   |   |
| Ruminococcaceae(f)_182036      | -1.78 | 0.04    |   |   |
| Ruminococcaceae(f)_730906      | -1.76 | 0.05    |   |   |
| Ruminococcaceae(f)_194471      | -1.74 | 0.05    |   |   |
| Lachnospiraceae(f)_4396426     | -1.73 | 0.03    |   |   |
| Lachnobacterium_3943186        | -1.64 | 0.04    |   |   |
| Clostridiales(o)_177032        | -1.55 | 0.04    |   |   |
| Roseburia_faecis_2532173       | -1.48 | 0.05    | x |   |

|                            |       |      |  |  |
|----------------------------|-------|------|--|--|
| Lachnospiraceae(f)_4481195 | -1.48 | 0.03 |  |  |
|----------------------------|-------|------|--|--|
