# Supplementary material for: A Disease-Associated Microbial and Metabolomics State in Relatives of Pediatric Inflammatory Bowel Disease Patients
Source: PubMed Central journal article supplement — Cell Mol Gastroenterol Hepatol. 2016 Jul 2;2(6):750–66. doi: 10.1016/j.jcmgh.2016.06.004 (PMC5247316; doi:10.1016/j.jcmgh.2016.06.004), 2016-07-02
Supplement: mmc2.pdf [file mmc2.pdf]

## DATA FILE S2

### CD vs non-IBD

| ESI mode | Ion             | Log2 FC | Q-value | Validated ID | Overlap with metabotype |
|----------|-----------------|---------|---------|--------------|-------------------------|
| Positive | 479.2784_3.8324 | 7.84    | 0.002   |              |                         |
| Positive | 752.4485_4.3337 | 6.15    | 0.011   |              |                         |
| Positive | 708.4223_4.2912 | 5.85    | 0.027   |              |                         |
| Positive | 783.479_4.3649  | 5.80    | 0.027   |              |                         |
| Positive | 509.8048_4.0186 | 5.79    | 0.013   |              |                         |
| Positive | 488.7993_3.8092 | 5.66    | 0.036   |              |                         |
| Positive | 173.1647_2.242  | 5.48    | 0.045   |              |                         |
| Positive | 321.1808_4.5154 | -4.12   | 0.027   |              | x                       |
| Positive | 611.3437_4.3716 | -4.51   | 0.027   |              | x                       |

### UC vs non-IBD

| ESI mode | Ion             | Log2 FC | Q-value | Validated ID          | Overlap with metabotype |
|----------|-----------------|---------|---------|-----------------------|-------------------------|
| Negative | 150.0546_3.2145 | 6.76    | 0.027   |                       |                         |
| Negative | 108.0437_0.993  | 6.05    | 0.014   |                       |                         |
| Positive | 154.0509_0.9254 | 5.86    | 1.0E-04 | 5-aminosalicylic acid |                         |
| Positive | 196.0604_2.9493 | 5.75    | 0.008   |                       |                         |
| Positive | 136.0407_0.9222 | 5.60    | 0.007   |                       |                         |
| Negative | 194.0443_3.2148 | 5.48    | 0.014   |                       |                         |
| Negative | 152.0343_0.9903 | 4.56    | 0.002   | 5-aminosalicylic acid |                         |
| Negative | 202.0712_0.9967 | 2.83    | 0.014   |                       | x                       |
| Positive | 373.274_6.5337  | -3.48   | 0.027   |                       |                         |

### Metabotype 2 vs. 1

| ESI mode | Ion             | Log2 FC | Q-value | Validated ID                |
|----------|-----------------|---------|---------|-----------------------------|
| Negative | 589.3029_4.8287 | 9.57    | 4.7E-16 |                             |
| Negative | 556.3314_5.6626 | 8.98    | 8.1E-11 |                             |
| Negative | 611.2826_4.6855 | 8.67    | 4.7E-16 |                             |
| Positive | 632.4107_5.9785 | 8.60    | 1.2E-07 |                             |
| Positive | 407.2797_5.5815 | 8.12    | 1.8E-10 | 7-Ketodeoxycholic acid      |
| Negative | 385.1334_5.3172 | 8.03    | 2.9E-07 |                             |
| Positive | 613.2999_4.583  | 8.00    | 4.7E-16 |                             |
| Positive | 357.2783_5.8275 | 7.97    | 6.0E-06 |                             |
| Negative | 405.2631_5.8089 | 7.93    | 0.003   |                             |
| Positive | 371.2584_5.555  | 7.71    | 7.8E-07 | 3-Oxo-4,6-choladienoic acid |
| Negative | 397.2052_5.4302 | 7.49    | 2.1E-05 |                             |
| Negative | 498.2867_5.4288 | 7.47    | 1.2E-06 | Taurochenodeoxycholate      |
| Positive | 335.2365_5.5524 | 7.46    | 3.4E-04 |                             |
| Negative | 587.2878_5.274  | 7.44    | 5.7E-08 |                             |

|          |                 |      |         |                         |
|----------|-----------------|------|---------|-------------------------|
| Positive | 389.2688_5.5598 | 7.41 | 5.7E-08 |                         |
| Negative | 493.2234_5.8191 | 7.34 | 1.9E-07 | 3-Sulfodeoxycholic acid |
| Negative | 443.2574_6.0663 | 7.33 | 2.9E-05 |                         |
| Negative | 536.3226_5.3551 | 7.24 | 3.1E-05 |                         |
| Positive | 337.2541_5.9828 | 7.22 | 9.4E-04 |                         |
| Negative | 405.2632_5.6659 | 7.21 | 1.8E-06 | 7-Ketodeoxycholic acid  |
| Negative | 545.3117_4.691  | 7.19 | 1.7E-07 |                         |
| Positive | 353.248_5.5509  | 7.17 | 2.1E-06 |                         |
| Positive | 247.1287_1.9494 | 7.08 | 1.2E-07 |                         |
| Negative | 194.0487_1.2085 | 7.02 | 8.3E-07 |                         |
| Positive | 629.2674_4.5797 | 7.02 | 3.4E-08 |                         |
| Positive | 424.3058_5.5396 | 7.00 | 1.9E-07 |                         |
| Negative | 475.2688_6.2292 | 6.99 | 1.1E-04 |                         |
| Positive | 468.2506_6.0942 | 6.95 | 5.7E-04 |                         |
| Positive | 799.5687_5.9584 | 6.85 | 1.4E-04 |                         |
| Positive | 274.144_4.9738  | 6.79 | 2.8E-08 |                         |
| Positive | 632.9135_5.9509 | 6.71 | 2.6E-05 |                         |
| Negative | 399.1489_5.4445 | 6.62 | 1.1E-06 |                         |
| Positive | 373.2741_4.7803 | 6.60 | 5.5E-05 |                         |
| Negative | 375.1827_5.4724 | 6.55 | 6.4E-06 |                         |
| Positive | 607.3145_5.3077 | 6.51 | 0.013   |                         |
| Negative | 272.1296_5.1129 | 6.48 | 6.4E-06 |                         |
| Positive | 429.2621_5.5639 | 6.45 | 4.5E-03 |                         |
| Positive | 355.2632_5.9773 | 6.39 | 3.5E-08 |                         |
| Negative | 498.2895_5.6354 | 6.35 | 7.0E-05 | Taurochenodeoxycholate  |
| Negative | 591.318_6.2442  | 6.34 | 5.5E-07 |                         |
| Positive | 357.2788_6.8897 | 6.31 | 1.9E-07 |                         |
| Negative | 476.2727_6.1139 | 6.29 | 2.7E-05 |                         |
| Negative | 453.2315_6.2465 | 6.28 | 0.003   |                         |
| Negative | 415.1864_3.6039 | 6.27 | 0.020   |                         |
| Positive | 431.2786_5.9801 | 6.15 | 1.1E-06 | Cholic Acid             |
| Negative | 143.0712_1.4524 | 6.08 | 0.025   |                         |
| Positive | 468.2492_4.2929 | 6.05 | 6.0E-07 |                         |
| Positive | 315.1348_4.575  | 6.04 | 3.7E-07 |                         |
| Negative | 613.2984_6.2629 | 6.04 | 0.002   |                         |
| Positive | 591.3154_6.0937 | 6.03 | 0.026   |                         |
| Positive | 785.5953_6.8808 | 5.97 | 0.027   |                         |
| Positive | 229.1553_0.9898 | 5.96 | 1.2E-06 |                         |
| Positive | 389.2685_5.188  | 5.95 | 0.028   |                         |
| Positive | 593.3334_6.0881 | 5.95 | 3.7E-07 |                         |
| Negative | 466.1253_0.8949 | 5.89 | 9.8E-04 |                         |
| Positive | 426.322_5.4095  | 5.88 | 0.030   |                         |
| Negative | 357.0757_1.8091 | 5.87 | 0.009   |                         |
| Positive | 615.3156_6.1003 | 5.82 | 3.6E-05 |                         |
| Negative | 514.2822_4.9444 | 5.80 | 0.002   |                         |
| Negative | 426.1955_5.0671 | 5.79 | 0.033   |                         |
| Negative | 442.1897_4.8568 | 5.79 | 0.033   |                         |

|          |                 |      |         |                                  |
|----------|-----------------|------|---------|----------------------------------|
| Positive | 251.1602_0.7512 | 5.78 | 2.8E-05 |                                  |
| Positive | 303.1713_4.2478 | 5.78 | 5.5E-03 |                                  |
| Positive | 253.1566_1.3107 | 5.78 | 0.033   |                                  |
| Negative | 405.2648_6.2066 | 5.77 | 0.034   |                                  |
| Negative | 407.2791_4.877  | 5.71 | 7.6E-06 |                                  |
| Positive | 276.1598_4.9131 | 5.69 | 0.001   |                                  |
| Positive | 407.2795_4.978  | 5.68 | 0.004   | 7-Ketodeoxycholic acid           |
| Negative | 274.1458_5.0667 | 5.63 | 0.038   |                                  |
| Positive | 373.2737_5.978  | 5.62 | 6.1E-07 |                                  |
| Negative | 405.2646_6.0966 | 5.62 | 0.035   |                                  |
| Negative | 459.2716_6.238  | 5.59 | 0.038   |                                  |
| Negative | 487.2369_5.254  | 5.54 | 1.9E-05 | 7-Sulfocholic acid               |
| Positive | 267.1711_2.4522 | 5.53 | 0.003   |                                  |
| Positive | 159.1483_1.2432 | 5.52 | 0.005   |                                  |
| Positive | 355.2626_6.1642 | 5.51 | 7.5E-04 |                                  |
| Positive | 426.3214_5.9814 | 5.51 | 1.4E-10 |                                  |
| Positive | 575.3707_5.5478 | 5.51 | 0.042   |                                  |
| Positive | 371.2558_5.1913 | 5.48 | 0.043   |                                  |
| Positive | 126.0235_0.8442 | 5.47 | 9.1E-08 |                                  |
| Positive | 355.2629_5.1581 | 5.47 | 7.8E-07 | 7,10,13,16-Docosatetraenoic acid |
| Negative | 407.2788_6.2278 | 5.47 | 2.0E-04 |                                  |
| Negative | 437.2906_6.2075 | 5.46 | 7.1E-04 |                                  |
| Positive | 302.2326_5.1092 | 5.46 | 0.044   |                                  |
| Negative | 412.1797_4.8941 | 5.44 | 0.044   |                                  |
| Positive | 426.3204_6.2157 | 5.43 | 0.005   |                                  |
| Positive | 265.1514_5.9857 | 5.43 | 0.001   |                                  |
| Positive | 355.2632_4.7754 | 5.43 | 0.010   |                                  |
| Positive | 247.1295_2.2814 | 5.42 | 0.002   |                                  |
| Positive | 373.2738_5.3622 | 5.40 | 7.6E-06 |                                  |
| Positive | 339.2674_6.8928 | 5.37 | 0.047   |                                  |
| Positive | 391.2851_5.9897 | 5.33 | 3.0E-06 |                                  |
| Negative | 205.036_0.8938  | 5.32 | 0.005   |                                  |
| Positive | 389.2686_4.9418 | 5.31 | 0.049   |                                  |
| Negative | 173.0099_0.9894 | 5.26 | 0.035   |                                  |
| Negative | 367.1585_5.2159 | 5.26 | 3.8E-06 |                                  |
| Positive | 426.3208_5.1578 | 5.22 | 4.3E-05 |                                  |
| Negative | 475.2671_6.081  | 5.16 | 1.2E-04 |                                  |
| Positive | 346.2703_8.6613 | 5.13 | 3.6E-04 |                                  |
| Negative | 407.2794_5.4892 | 5.12 | 7.2E-06 |                                  |
| Positive | 143.0726_0.8995 | 5.12 | 0.005   |                                  |
| Positive | 256.1461_5.9852 | 5.09 | 6.6E-04 |                                  |
| Positive | 291.1693_5.6892 | 5.08 | 0.039   |                                  |
| Positive | 355.2615_5.4202 | 5.04 | 0.009   |                                  |
| Negative | 799.5738_6.183  | 5.04 | 0.002   |                                  |
| Negative | 269.0444_5.1218 | 4.95 | 0.035   |                                  |
| Negative | 589.3019_4.6741 | 4.91 | 5.7E-08 |                                  |
| Positive | 391.2844_5.1658 | 4.90 | 5.1E-04 |                                  |

|          |                 |      |         |         |
|----------|-----------------|------|---------|---------|
| Positive | 373.2737_5.1357 | 4.87 | 2.8E-07 |         |
| Negative | 166.0176_0.9396 | 4.86 | 6.7E-05 |         |
| Negative | 353.0999_3.9251 | 4.80 | 0.001   |         |
| Negative | 485.2209_4.8745 | 4.74 | 0.002   |         |
| Negative | 515.3057_6.2301 | 4.74 | 0.033   |         |
| Positive | 392.3166_5.673  | 4.73 | 2.6E-05 |         |
| Positive | 235.632_5.9721  | 4.72 | 1.3E-04 |         |
| Positive | 309.1644_0.8126 | 4.67 | 0.001   |         |
| Positive | 589.3026_5.154  | 4.67 | 2.7E-05 |         |
| Negative | 289.1555_5.8038 | 4.61 | 2.3E-04 |         |
| Negative | 133.0499_1.0336 | 4.60 | 0.006   |         |
| Positive | 493.2449_5.9568 | 4.54 | 0.005   |         |
| Positive | 357.2791_5.6808 | 4.54 | 6.5E-04 |         |
| Positive | 244.6374_5.9809 | 4.48 | 8.0E-05 |         |
| Positive | 145.0499_0.8983 | 4.46 | 1.2E-04 |         |
| Negative | 344.1809_3.4212 | 4.40 | 0.010   |         |
| Negative | 407.2793_6.4209 | 4.36 | 0.009   |         |
| Positive | 201.9346_0.8002 | 4.34 | 4.6E-06 |         |
| Negative | 317.1464_0.8437 | 4.31 | 0.025   |         |
| Positive | 243.1349_2.3083 | 4.28 | 7.5E-05 |         |
| Positive | 303.1714_4.0203 | 4.27 | 0.003   |         |
| Positive | 591.3179_4.5766 | 4.27 | 1.3E-09 |         |
| Positive | 241.1552_0.9974 | 4.23 | 9.4E-04 |         |
| Negative | 156.0666_1.0014 | 4.22 | 9.4E-04 |         |
| Positive | 324.29_8.6656   | 4.22 | 9.0E-04 |         |
| Positive | 442.2693_3.4706 | 4.20 | 0.026   |         |
| Positive | 319.1921_6.0283 | 4.15 | 3.2E-04 |         |
| Negative | 124.0067_0.8872 | 4.14 | 7.4E-08 | Taurine |
| Negative | 124.9904_0.9145 | 4.09 | 4.2E-04 |         |
| Negative | 469.228_5.1926  | 4.06 | 0.005   |         |
| Positive | 319.1603_0.8174 | 4.04 | 5.3E-06 |         |
| Negative | 539.1375_0.8801 | 4.02 | 0.016   |         |
| Negative | 286.0016_2.6719 | 4.01 | 0.003   |         |
| Negative | 243.1231_4.6191 | 4.01 | 0.013   |         |
| Negative | 121.0655_3.9387 | 3.97 | 7.9E-05 |         |
| Negative | 319.191_4.398   | 3.93 | 0.021   |         |
| Positive | 255.0672_4.4672 | 3.92 | 0.031   |         |
| Negative | 327.0515_3.2674 | 3.86 | 0.003   |         |
| Negative | 253.1193_2.328  | 3.84 | 0.008   |         |
| Negative | 379.0978_0.8896 | 3.83 | 0.004   |         |
| Positive | 442.2104_5.701  | 3.83 | 0.002   |         |
| Positive | 114.0874_0.8408 | 3.82 | 1.4E-04 |         |
| Negative | 405.2646_5.0509 | 3.74 | 0.032   |         |
| Positive | 269.1752_3.3247 | 3.72 | 0.005   |         |
| Positive | 171.1495_0.7788 | 3.70 | 0.005   |         |
| Positive | 373.2749_7.0789 | 3.68 | 0.010   |         |
| Positive | 242.0429_0.9223 | 3.68 | 1.1E-04 |         |

|          |                 |      |         |                               |
|----------|-----------------|------|---------|-------------------------------|
| Positive | 144.0814_2.9765 | 3.64 | 0.005   | Phenethylamine                |
| Negative | 471.2406_5.8057 | 3.64 | 8.6E-04 | Chenodeoxycholic acid sulfate |
| Positive | 295.1437_5.688  | 3.63 | 2.7E-04 |                               |
| Positive | 543.1309_0.8156 | 3.63 | 4.3E-04 |                               |
| Positive | 496.3379_7.9889 | 3.62 | 0.015   |                               |
| Positive | 226.1518_0.9523 | 3.61 | 0.004   |                               |
| Positive | 325.1119_0.8692 | 3.61 | 2.5E-04 |                               |
| Negative | 321.1292_0.8173 | 3.58 | 0.020   |                               |
| Positive | 383.0944_0.8064 | 3.55 | 7.1E-04 |                               |
| Negative | 285.1703_3.4399 | 3.50 | 0.001   |                               |
| Negative | 254.0699_1.0384 | 3.48 | 0.032   |                               |
| Positive | 203.054_0.8276  | 3.47 | 4.7E-05 |                               |
| Negative | 259.1451_3.7921 | 3.45 | 0.002   |                               |
| Positive | 310.1301_1.5025 | 3.45 | 0.035   |                               |
| Negative | 469.2261_5.4088 | 3.42 | 0.008   |                               |
| Negative | 130.0861_2.1345 | 3.39 | 0.031   |                               |
| Negative | 407.2789_6.08   | 3.37 | 8.0E-05 | Cholic Acid                   |
| Negative | 181.0362_1.1213 | 3.36 | 7.9E-04 |                               |
| Negative | 305.0698_3.4475 | 3.31 | 0.021   |                               |
| Positive | 146.1176_1.0253 | 3.30 | 0.047   |                               |
| Positive | 300.1559_5.4295 | 3.25 | 0.009   |                               |
| Negative | 187.0373_3.9347 | 3.22 | 0.007   |                               |
| Positive | 307.1868_0.8774 | 3.18 | 0.004   |                               |
| Negative | 163.0601_0.9071 | 3.16 | 0.012   |                               |
| Negative | 435.1276_0.9265 | 3.15 | 0.016   |                               |
| Negative | 119.0348_0.8648 | 3.13 | 0.009   |                               |
| Positive | 466.3176_5.3628 | 3.13 | 0.046   |                               |
| Positive | 393.3195_5.6367 | 3.13 | 0.041   |                               |
| Negative | 96.9615_0.9836  | 3.12 | 2.0E-04 |                               |
| Negative | 124.0078_1.0052 | 3.05 | 0.003   | Taurine                       |
| Negative | 487.2364_5.0286 | 3.04 | 0.035   |                               |
| Positive | 105.0698_2.322  | 3.03 | 0.020   |                               |
| Positive | 101.0606_0.8469 | 3.01 | 1.2E-05 |                               |
| Positive | 287.2434_0.7876 | 3.00 | 5.3E-04 |                               |
| Negative | 471.2406_5.2037 | 3.00 | 0.023   | Chenodeoxycholic acid sulfate |
| Negative | 407.279_5.2626  | 2.99 | 6.1E-04 |                               |
| Negative | 471.2407_5.4898 | 2.98 | 0.016   | Chenodeoxycholic acid sulfate |
| Negative | 607.3141_5.1374 | 2.98 | 0.050   |                               |
| Negative | 284.0996_0.8839 | 2.97 | 0.044   |                               |
| Negative | 240.9688_0.8143 | 2.96 | 0.003   |                               |
| Positive | 223.1081_2.6583 | 2.95 | 0.019   |                               |
| Positive | 171.0794_0.827  | 2.94 | 0.002   |                               |
| Negative | 87.0089_0.9968  | 2.91 | 0.043   |                               |
| Negative | 377.085_0.892   | 2.89 | 2.0E-04 |                               |
| Positive | 277.1186_2.7869 | 2.87 | 0.009   |                               |
| Negative | 343.1957_3.3207 | 2.86 | 0.029   |                               |
| Negative | 701.1903_0.891  | 2.86 | 0.042   |                               |

|          |                 |      |         |
|----------|-----------------|------|---------|
| Negative | 159.066_1.0792  | 2.83 | 0.047   |
| Positive | 189.1614_0.8254 | 2.82 | 0.009   |
| Positive | 201.123_1.0094  | 2.81 | 0.024   |
| Positive | 331.1872_5.621  | 2.77 | 0.010   |
| Positive | 219.0281_0.8177 | 2.76 | 2.6E-06 |
| Positive | 365.0997_0.8288 | 2.72 | 0.009   |
| Positive | 317.0235_0.7582 | 2.71 | 0.009   |
| Negative | 329.2329_5.4488 | 2.71 | 0.007   |
| Positive | 271.0821_2.3981 | 2.70 | 0.027   |
| Negative | 202.0712_0.9967 | 2.69 | 2.7E-05 |
| Negative | 229.155_3.0436  | 2.69 | 0.020   |
| Positive | 280.1392_0.8706 | 2.68 | 6.1E-04 |
| Negative | 341.1082_0.8545 | 2.64 | 0.013   |
| Positive | 221.15_0.7462   | 2.60 | 0.035   |
| Negative | 317.1502_4.6189 | 2.57 | 0.019   |
| Positive | 215.1028_0.9795 | 2.57 | 0.008   |
| Negative | 359.0763_3.0846 | 2.54 | 0.049   |
| Positive | 131.1172_0.8442 | 2.52 | 0.033   |
| Positive | 323.1604_3.6842 | 2.51 | 0.031   |
| Negative | 165.055_3.9364  | 2.50 | 0.003   |
| Positive | 146.0609_2.6208 | 2.47 | 0.030   |
| Negative | 119.0498_3.9309 | 2.47 | 0.019   |
| Positive | 243.1407_0.8621 | 2.43 | 0.004   |
| Positive | 183.0852_0.8744 | 2.35 | 0.035   |
| Positive | 85.0282_0.8849  | 2.33 | 0.010   |
| Negative | 305.0694_3.2644 | 2.32 | 0.011   |
| Positive | 277.0759_0.8885 | 2.31 | 0.005   |
| Positive | 381.0802_0.8154 | 2.30 | 2.5E-04 |
| Negative | 193.0344_0.8947 | 2.29 | 0.003   |
| Positive | 183.1119_1.0703 | 2.28 | 0.046   |
| Positive | 166.0777_0.9135 | 2.27 | 0.009   |
| Negative | 149.0456_0.9022 | 2.24 | 0.009   |
| Positive | 580.6564_5.1435 | 2.18 | 0.050   |
| Positive | 204.0902_0.9568 | 2.17 | 3.8E-04 |
| Positive | 243.1342_1.9576 | 2.17 | 0.024   |
| Positive | 233.1155_1.0717 | 2.16 | 0.043   |
| Positive | 532.0042_4.9757 | 2.15 | 0.046   |
| Positive | 123.0505_0.8741 | 2.12 | 0.013   |
| Positive | 128.1069_0.8991 | 2.07 | 0.015   |
| Positive | 230.1854_0.8989 | 2.07 | 0.007   |
| Positive | 159.1492_1.0029 | 2.06 | 0.015   |
| Positive | 100.0764_1.5459 | 2.05 | 0.007   |
| Positive | 244.0808_0.8577 | 2.02 | 0.007   |
| Positive | 263.1393_3.2193 | 2.02 | 0.019   |
| Positive | 145.1336_0.8918 | 2.00 | 0.009   |
| Positive | 332.9965_0.7666 | 2.00 | 0.029   |
| Positive | 152.028_0.8402  | 1.99 | 0.005   |

N-Acetylcadaverine

|          |                 |      |       |                    |
|----------|-----------------|------|-------|--------------------|
| Positive | 226.0718_0.9278 | 1.98 | 0.022 |                    |
| Positive | 673.423_4.9985  | 1.97 | 0.028 |                    |
| Positive | 578.8675_5.0025 | 1.97 | 0.001 |                    |
| Positive | 276.1462_1.0338 | 1.89 | 0.034 |                    |
| Negative | 191.0555_0.9233 | 1.89 | 0.014 |                    |
| Positive | 574.2215_5.0989 | 1.88 | 0.031 |                    |
| Positive | 262.1303_0.9037 | 1.87 | 0.009 |                    |
| Positive | 249.0457_0.8026 | 1.86 | 0.011 |                    |
| Positive | 294.1537_1.0299 | 1.84 | 0.008 |                    |
| Negative | 89.0243_0.8666  | 1.83 | 0.007 |                    |
| Positive | 564.5236_5.0891 | 1.82 | 0.041 |                    |
| Positive | 272.1658_0.8523 | 1.80 | 0.035 |                    |
| Positive | 250.1286_0.8839 | 1.77 | 0.027 |                    |
| Positive | 215.1388_1.1735 | 1.76 | 0.024 |                    |
| Positive | 289.0986_0.8846 | 1.76 | 0.033 |                    |
| Negative | 215.0323_0.8906 | 1.74 | 0.002 |                    |
| Positive | 244.1999_0.9862 | 1.73 | 0.038 |                    |
| Positive | 374.2355_0.9052 | 1.71 | 0.034 |                    |
| Negative | 161.0455_0.8894 | 1.70 | 0.003 |                    |
| Positive | 339.269_7.0521  | 1.70 | 0.028 |                    |
| Negative | 117.0188_1.1458 | 1.69 | 0.036 |                    |
| Negative | 113.024_0.8863  | 1.67 | 0.005 |                    |
| Positive | 156.0769_0.824  | 1.65 | 0.020 |                    |
| Positive | 188.1756_0.7768 | 1.64 | 0.006 |                    |
| Positive | 600.8812_5.0254 | 1.62 | 0.009 |                    |
| Positive | 134.0457_0.8351 | 1.62 | 0.024 |                    |
| Positive | 217.1186_0.9427 | 1.57 | 0.008 |                    |
| Positive | 630.3982_5.0523 | 1.56 | 0.033 |                    |
| Positive | 189.0232_0.8231 | 1.53 | 0.018 |                    |
| Positive | 265.0207_0.7657 | 1.53 | 0.037 |                    |
| Negative | 174.0404_0.9909 | 1.48 | 0.035 |                    |
| Positive | 202.9714_0.7389 | 1.47 | 0.033 |                    |
| Positive | 385.9044_0.7337 | 1.47 | 0.048 |                    |
| Positive | 146.1179_0.8336 | 1.46 | 0.035 |                    |
| Positive | 205.0976_2.5971 | 1.43 | 0.037 | Tryptophan         |
| Positive | 586.3721_5.013  | 1.42 | 0.038 |                    |
| Positive | 246.1793_0.8212 | 1.41 | 0.034 |                    |
| Positive | 258.1088_0.8635 | 1.39 | 0.032 |                    |
| Negative | 131.0415_0.889  | 1.39 | 0.038 |                    |
| Positive | 301.1435_8.2587 | 1.36 | 0.038 |                    |
| Positive | 188.0711_2.6005 | 1.33 | 0.025 | Serinyl tryptophan |
| Positive | 335.124_8.1063  | 1.32 | 0.026 |                    |
| Negative | 179.0556_0.8637 | 1.31 | 0.002 |                    |
| Positive | 260.193_0.9965  | 1.29 | 0.044 |                    |
| Positive | 375.2242_0.9817 | 1.28 | 0.045 |                    |
| Positive | 410.3264_7.0503 | 1.28 | 0.048 |                    |
| Positive | 73.5172_0.7451  | 1.27 | 0.024 |                    |

|          |                 |       |         |                      |
|----------|-----------------|-------|---------|----------------------|
| Positive | 130.0533_0.8546 | 1.27  | 0.004   |                      |
| Positive | 104.1061_0.8037 | 1.25  | 0.034   |                      |
| Positive | 571.5299_5.0028 | 1.22  | 0.048   |                      |
| Positive | 176.1187_3.3908 | 1.18  | 0.024   |                      |
| Positive | 260.0539_0.8273 | 1.15  | 0.015   |                      |
| Positive | 255.1371_0.8587 | 1.14  | 0.041   |                      |
| Negative | 101.0246_0.8738 | 1.10  | 0.024   |                      |
| Negative | 132.0296_0.9036 | 0.90  | 0.043   |                      |
| Negative | 188.0559_1.0259 | -0.76 | 0.044   | Acetyl-glutamic acid |
| Negative | 251.0776_1.021  | -1.12 | 0.016   |                      |
| Positive | 520.333_3.5639  | -1.19 | 0.043   |                      |
| Negative | 283.1182_4.5585 | -1.32 | 0.047   |                      |
| Positive | 652.4109_3.7945 | -1.38 | 0.037   |                      |
| Negative | 187.0971_4.3188 | -1.42 | 0.010   | Azaleic acid         |
| Negative | 125.0967_4.2984 | -1.46 | 0.043   |                      |
| Positive | 414.7607_4.0011 | -1.47 | 0.013   |                      |
| Negative | 184.0015_0.8462 | -1.49 | 0.011   |                      |
| Positive | 445.2873_4.0565 | -1.59 | 0.049   |                      |
| Positive | 226.1048_0.9746 | -1.64 | 0.035   |                      |
| Negative | 349.0712_0.9498 | -1.71 | 0.044   |                      |
| Positive | 337.6653_4.5708 | -1.74 | 0.038   |                      |
| Positive | 362.221_3.9171  | -1.78 | 0.035   |                      |
| Positive | 696.4379_3.8367 | -1.82 | 0.043   |                      |
| Positive | 560.3285_3.5157 | -1.82 | 0.029   |                      |
| Negative | 227.0225_0.8685 | -1.83 | 0.018   |                      |
| Negative | 591.3178_4.6332 | -1.85 | 0.043   | Mesobilirubinogen    |
| Negative | 172.0615_1.0129 | -1.86 | 0.009   |                      |
| Positive | 180.1023_0.9652 | -1.96 | 0.045   |                      |
| Positive | 209.1175_3.5483 | -1.97 | 0.034   |                      |
| Positive | 686.9183_4.1458 | -1.97 | 0.049   |                      |
| Negative | 212.925_0.8376  | -1.97 | 0.016   |                      |
| Negative | 267.0733_1.0368 | -2.04 | 3.9E-04 |                      |
| Positive | 164.0702_3.9596 | -2.05 | 0.046   |                      |
| Negative | 410.8636_0.8271 | -2.07 | 0.011   |                      |
| Positive | 290.8487_0.7967 | -2.10 | 0.005   |                      |
| Positive | 295.1654_2.8735 | -2.14 | 0.043   | Estradiol            |
| Negative | 257.9333_0.8656 | -2.20 | 5.7E-04 |                      |
| Negative | 267.9633_0.832  | -2.25 | 0.011   |                      |
| Negative | 201.1128_4.7648 | -2.27 | 2.2E-05 |                      |
| Positive | 182.0816_3.977  | -2.27 | 0.002   |                      |
| Positive | 196.0971_0.9926 | -2.28 | 0.005   |                      |
| Negative | 440.8814_0.8072 | -2.30 | 0.021   |                      |
| Negative | 115.076_3.7638  | -2.33 | 0.005   |                      |
| Negative | 139.1124_4.7645 | -2.34 | 4.2E-04 |                      |
| Negative | 159.0659_3.7654 | -2.35 | 0.012   |                      |
| Positive | 443.2693_3.9619 | -2.39 | 0.016   |                      |
| Negative | 211.0276_0.8806 | -2.40 | 0.018   |                      |



|          |                 |       |         |
|----------|-----------------|-------|---------|
| Positive | 303.1694_4.492  | -2.41 | 0.048   |
| Positive | 549.3463_5.0632 | -2.42 | 0.012   |
| Negative | 227.0673_1.0436 | -2.45 | 0.037   |
| Positive | 344.2515_3.7491 | -2.45 | 0.044   |
| Negative | 184.0618_1.16   | -2.46 | 0.033   |
| Positive | 218.1381_0.9957 | -2.47 | 0.029   |
| Negative | 229.1439_5.5632 | -2.48 | 2.3E-04 |
| Negative | 297.113_5.4414  | -2.50 | 0.021   |
| Positive | 768.4697_4.3531 | -2.52 | 0.012   |
| Positive | 740.4628_3.9154 | -2.57 | 0.017   |
| Negative | 138.0556_1.0851 | -2.58 | 0.004   |
| Positive | 421.256_3.9007  | -2.65 | 0.007   |
| Negative | 367.0807_0.8921 | -2.67 | 0.014   |
| Negative | 206.0453_1.8664 | -2.67 | 0.035   |
| Negative | 380.8445_0.8199 | -2.76 | 0.020   |
| Negative | 326.9018_0.8129 | -2.77 | 0.005   |
| Negative | 145.05_2.475    | -2.79 | 0.049   |
| Negative | 197.0671_0.9601 | -2.84 | 0.048   |
| Positive | 174.1221_0.9965 | -2.85 | 0.014   |
| Positive | 665.7434_4.2095 | -2.86 | 0.049   |
| Negative | 227.1285_5.3716 | -2.89 | 0.007   |
| Positive | 659.7361_4.4323 | -2.91 | 0.020   |
| Positive | 399.2402_3.8135 | -2.91 | 0.045   |
| Negative | 167.1438_5.5621 | -2.95 | 6.3E-04 |
| Positive | 210.113_0.9352  | -2.95 | 0.036   |
| Positive | 133.0863_3.9597 | -2.95 | 0.020   |
| Positive | 225.1151_3.6524 | -3.02 | 0.013   |
| Positive | 539.833_4.0684  | -3.05 | 0.029   |
| Negative | 297.1126_5.2941 | -3.08 | 1.9E-04 |
| Positive | 377.2273_3.7823 | -3.10 | 0.040   |
| Negative | 241.1076_3.7694 | -3.12 | 0.006   |
| Positive | 783.479_4.3649  | -3.12 | 0.019   |
| Positive | 377.7291_3.8236 | -3.13 | 0.035   |
| Positive | 451.7792_3.8998 | -3.13 | 0.022   |
| Positive | 181.1226_3.5359 | -3.16 | 0.041   |
| Positive | 231.1135_3.4172 | -3.18 | 0.005   |
| Negative | 131.0344_1.4294 | -3.19 | 0.016   |
| Positive | 227.129_3.5401  | -3.21 | 4.0E-04 |
| Positive | 741.465_3.8812  | -3.22 | 0.006   |
| Positive | 466.7836_3.7877 | -3.30 | 0.034   |
| Positive | 545.8179_3.8941 | -3.31 | 0.029   |
| Negative | 229.0975_3.3707 | -3.32 | 0.019   |
| Positive | 615.5551_5.2136 | -3.37 | 0.035   |
| Negative | 245.1386_4.2957 | -3.39 | 0.006   |
| Negative | 163.1148_3.6399 | -3.41 | 0.010   |
| Negative | 331.1907_8.1156 | -3.42 | 0.010   |
| Negative | 229.1456_3.6622 | -3.47 | 2.1E-04 |

|          |                 |       |         |                               |
|----------|-----------------|-------|---------|-------------------------------|
| Positive | 680.421_4.2548  | -3.47 | 0.029   |                               |
| Positive | 465.7782_3.795  | -3.52 | 0.009   |                               |
| Positive | 179.107_3.6549  | -3.55 | 0.003   |                               |
| Positive | 207.1035_3.6551 | -3.56 | 0.037   |                               |
| Negative | 301.2015_5.4483 | -3.56 | 5.5E-05 |                               |
| Positive | 307.2029_5.2062 | -3.63 | 0.026   |                               |
| Positive | 595.3488_4.583  | -3.63 | 3.9E-06 |                               |
| Positive | 479.2784_3.8324 | -3.65 | 0.015   |                               |
| Negative | 319.166_4.5962  | -3.65 | 5.0E-10 | Androsta-1,4-diene-3,17-dione |
| Negative | 263.0896_3.7683 | -3.68 | 4.9E-02 |                               |
| Negative | 359.1897_5.7837 | -3.69 | 0.001   |                               |
| Negative | 265.1055_3.6138 | -3.69 | 0.044   |                               |
| Negative | 181.0869_3.7611 | -3.71 | 4.5E-04 |                               |
| Negative | 321.2072_5.9243 | -3.74 | 0.021   |                               |
| Positive | 619.3484_6.1341 | -3.76 | 0.011   |                               |
| Negative | 443.0079_3.5033 | -3.78 | 0.030   |                               |
| Positive | 519.3238_3.8593 | -3.80 | 0.026   |                               |
| Negative | 87.0446_1.4442  | -3.81 | 0.015   |                               |
| Negative | 277.0502_0.9365 | -3.82 | 1.9E-04 |                               |
| Positive | 210.1132_1.3534 | -3.82 | 0.029   |                               |
| Positive | 584.3554_4.2064 | -3.83 | 0.024   |                               |
| Positive | 211.1329_3.6523 | -3.85 | 0.008   |                               |
| Positive | 488.7993_3.8092 | -3.85 | 0.002   |                               |
| Positive | 271.1652_2.8472 | -3.85 | 0.004   |                               |
| Positive | 135.1169_3.5732 | -3.88 | 0.002   |                               |
| Negative | 209.0796_4.304  | -3.90 | 0.013   |                               |
| Negative | 131.0713_2.5122 | -3.91 | 0.002   |                               |
| Positive | 455.2477_3.3201 | -3.93 | 0.009   |                               |
| Positive | 211.134_5.033   | -3.93 | 0.011   |                               |
| Positive | 611.3472_4.111  | -3.95 | 2.4E-04 |                               |
| Negative | 315.1227_4.174  | -3.97 | 1.1E-04 |                               |
| Positive | 121.1027_3.5352 | -3.97 | 3.8E-04 |                               |
| Positive | 191.106_3.5461  | -3.98 | 3.1E-04 |                               |
| Positive | 343.1625_4.4913 | -4.04 | 0.003   |                               |
| Positive | 309.1775_3.0874 | -4.04 | 0.006   | Androstenedione               |
| Negative | 379.2119_5.1469 | -4.10 | 0.003   |                               |
| Positive | 509.8048_4.0186 | -4.14 | 3.3E-04 |                               |
| Positive | 267.121_3.5344  | -4.15 | 0.002   |                               |
| Negative | 373.2739_8.5093 | -4.15 | 0.009   |                               |
| Positive | 636.3947_4.2305 | -4.16 | 0.024   |                               |
| Positive | 156.103_2.8948  | -4.23 | 2.1E-05 |                               |
| Negative | 231.0984_0.8264 | -4.24 | 1.2E-04 |                               |
| Negative | 305.1863_5.2337 | -4.24 | 0.007   |                               |
| Positive | 321.1808_4.5154 | -4.25 | 3.6E-09 |                               |
| Positive | 313.1082_4.169  | -4.29 | 0.003   |                               |
| Positive | 221.1444_3.9338 | -4.29 | 0.007   |                               |
| Negative | 201.0118_0.997  | -4.30 | 0.046   |                               |

|          |                 |       |         |             |
|----------|-----------------|-------|---------|-------------|
| Negative | 280.029_1.1019  | -4.31 | 0.002   |             |
| Negative | 159.0659_3.2534 | -4.33 | 0.004   |             |
| Positive | 182.117_5.0401  | -4.34 | 1.0E-04 |             |
| Positive | 348.1459_4.1753 | -4.36 | 0.003   |             |
| Positive | 457.2624_3.8029 | -4.37 | 0.002   |             |
| Positive | 553.3347_4.1701 | -4.43 | 0.009   |             |
| Positive | 399.2283_5.1237 | -4.56 | 0.003   |             |
| Negative | 418.2135_4.6056 | -4.57 | 0.020   |             |
| Negative | 285.1132_5.0484 | -4.58 | 5.1E-06 |             |
| Positive | 472.2435_4.5582 | -4.61 | 6.4E-04 |             |
| Positive | 265.1057_3.6562 | -4.61 | 5.6E-04 |             |
| Positive | 722.4452_5.9167 | -4.62 | 0.014   |             |
| Negative | 595.3497_6.2462 | -4.64 | 6.1E-04 |             |
| Positive | 633.2972_4.5636 | -4.65 | 1.3E-04 |             |
| Positive | 434.2642_4.4206 | -4.67 | 0.009   |             |
| Positive | 307.1646_4.3363 | -4.69 | 0.032   |             |
| Positive | 311.1603_2.4386 | -4.74 | 0.022   |             |
| Negative | 243.1234_3.6176 | -4.81 | 5.7E-08 |             |
| Positive | 325.174_3.8063  | -4.85 | 1.2E-04 |             |
| Positive | 329.184_5.0261  | -4.85 | 1.5E-06 |             |
| Positive | 564.3587_3.8192 | -4.86 | 0.003   |             |
| Negative | 209.0673_2.6988 | -4.88 | 3.0E-04 |             |
| Negative | 295.062_0.8812  | -4.89 | 0.003   |             |
| Negative | 305.1864_5.0961 | -4.90 | 1.1E-04 |             |
| Positive | 281.1174_4.0698 | -4.90 | 0.005   |             |
| Negative | 609.3293_4.4399 | -4.92 | 1.6E-07 |             |
| Negative | 720.4337_5.9728 | -4.95 | 0.038   |             |
| Negative | 323.1577_3.9981 | -4.99 | 1.1E-04 |             |
| Positive | 311.1609_3.0473 | -4.99 | 7.9E-04 |             |
| Positive | 174.1138_2.9138 | -5.04 | 1.2E-05 |             |
| Positive | 487.2935_3.9841 | -5.04 | 0.001   |             |
| Positive | 309.1812_4.1209 | -5.08 | 7.2E-07 |             |
| Positive | 295.0971_4.2243 | -5.09 | 0.001   |             |
| Negative | 351.0859_4.2565 | -5.15 | 0.027   |             |
| Positive | 283.1654_2.3657 | -5.19 | 2.7E-04 |             |
| Negative | 593.3325_4.6412 | -5.19 | 2.8E-13 | Stercobilin |
| Negative | 365.1967_4.8918 | -5.22 | 1.1E-03 |             |
| Positive | 307.2017_5.0302 | -5.22 | 5.7E-08 |             |
| Negative | 385.1686_4.3367 | -5.28 | 0.050   |             |
| Positive | 420.2279_4.5397 | -5.30 | 8.3E-07 |             |
| Positive | 182.0816_4.2585 | -5.34 | 7.6E-06 |             |
| Positive | 370.2227_4.4035 | -5.37 | 0.009   |             |
| Positive | 595.3505_4.8372 | -5.37 | 3.8E-06 |             |
| Negative | 486.2245_4.4763 | -5.40 | 0.046   |             |
| Positive | 317.1512_4.5777 | -5.42 | 1.1E-07 |             |
| Positive | 309.1807_3.958  | -5.52 | 2.3E-05 |             |
| Positive | 617.3315_4.5958 | -5.61 | 2.8E-13 |             |

|          |                 |       |         |
|----------|-----------------|-------|---------|
| Positive | 226.1076_1.7987 | -5.69 | 4.2E-04 |
| Negative | 549.3429_4.6457 | -5.75 | 4.8E-09 |
| Positive | 611.3437_4.3716 | -5.79 | 6.9E-13 |
| Positive | 597.3657_6.1306 | -5.80 | 2.1E-07 |
| Negative | 615.3157_4.642  | -5.81 | 3.0E-10 |
| Negative | 285.1131_4.4155 | -5.96 | 0.001   |
| Negative | 472.2444_4.6966 | -5.98 | 0.027   |
| Negative | 470.2283_4.6311 | -6.03 | 2.2E-07 |
| Positive | 607.3137_4.8497 | -6.08 | 0.002   |
| Negative | 307.1662_4.1964 | -6.15 | 1.2E-07 |
| Positive | 265.1539_1.9924 | -6.18 | 0.002   |
| Positive | 635.3769_5.0283 | -6.26 | 2.8E-05 |
| Positive | 641.3519_4.4885 | -6.33 | 4.5E-06 |
| Positive | 325.1758_2.7968 | -6.33 | 1.9E-06 |
| Negative | 635.3083_4.2934 | -6.44 | 2.8E-08 |
| Positive | 470.2656_4.3837 | -6.76 | 2.5E-07 |
| Positive | 305.1866_4.2135 | -6.87 | 4.2E-06 |
| Positive | 613.3624_5.1518 | -6.98 | 2.4E-08 |
| Positive | 638.3293_4.2388 | -7.00 | 4.4E-08 |
| Negative | 285.1127_4.2733 | -7.16 | 5.2E-10 |
| Negative | 261.1605_4.07   | -7.26 | 4.8E-07 |
| Negative | 313.1085_4.5438 | -7.49 | 2.3E-08 |
| Positive | 625.3591_4.6659 | -7.67 | 2.1E-10 |
| Negative | 593.334_4.8291  | -7.70 | 8.4E-14 |
| Negative | 623.3431_4.5972 | -7.84 | 3.3E-11 |
| Negative | 611.3452_5.2339 | -7.93 | 2.2E-07 |
| Negative | 327.0882_4.1465 | -8.01 | 4.2E-09 |
| Negative | 341.1492_4.5729 | -8.30 | 2.1E-07 |
| Negative | 261.1602_4.3845 | -8.36 | 1.5E-08 |
| Negative | 261.1598_3.8294 | -8.62 | 2.4E-08 |
| Positive | 637.322_4.2281  | -8.62 | 4.7E-16 |
| Positive | 625.3596_4.495  | -8.71 | 4.7E-16 |
